# Supplementary material for: Oxoketene–oxoketene, imidoylketene–imidoylketene and oxoketenimine–imidoylketene rearrangements. 1,3-Shifts of phenyl groups
Source: Royal Society of Chemistry journal article supplement (doi:10.1039/b515917b), 2006-01-01
Supplement: b515917b.pdf [file b515917b.pdf]

## **Electronic Supplementary Information**

### **Oxoketene-oxoketene, imidoylketene-imidoylketene and oxoketenimine-imidoylketene rearrangements. 1,3-Shifts of phenyl groups**

**Lisa George,<sup>a</sup> Klaus-Peter Netsch,<sup>b</sup> Gerhard Penn,<sup>c</sup> Gert Kollenz<sup>c</sup> and Curt Wentrup<sup>\*a</sup>**

<sup>a</sup>Chemistry Building, School of Molecular and Microbial Sciences, The University of Queensland, Brisbane, Qld 4072, Australia. E-mail: wentrup@uq.edu.au

<sup>b</sup>Fachbereich Chemie, Philipps-Universitaet Marburg, D-3550 Marburg, Germany

<sup>c</sup>Institut fuer Chemie, Karl-Franzens-Universitaet Graz, A-8010 Graz, Austria

**Summary of calculated energies (B3LYP/6-31G\*\*).**

| No. | Structures | Energy+ZPVE  | $\Delta E$ (+ZPVE) kJ/mol |
|-----|------------|--------------|---------------------------|
| 1   | 5a         | -841.168633  | 0                         |
| 2   | 6a         | -841.167108  | 4.0                       |
| 3   | TS3        | -841.118614  | 131.3                     |
| 4   | 13a        | -821.276866  | 0                         |
| 5   | 14a        | -821.272032  | 12.7                      |
| 6   | TS4        | -821.225179  | 135.7                     |
| 7   | 14b        | -821.273235  | 9.5                       |
| 8   | 15a        | -821.271875  | 13.1                      |
| 9   | TS5        | -821.212449  | 169.1                     |
| 10  | 32         | -821.268717  | 21.4                      |
| 11  | 33         | -821.280092  | -8.5                      |
| 12  | TS6        | -821.266448  | 27.4                      |
| 13  | TS7        | -821.265164  | 30.7                      |
| 14  | 34+35      | -821.259298  | 46.1                      |
| 15  | TS8        | -821.196527  | 210.9                     |
| 16  | 21         | -1091.545307 | 0                         |
| 17  | 22         | -1091.541747 | 9.3                       |
| 18  | TS9        | -1091.496373 | 128.5                     |
| 19  | 23         | -1091.546234 | -2.4                      |
| 20  | TS10       | -1091.486692 | 153.9                     |
| 21  | 23a        | -1091.543325 | 5.2                       |
| 22  | TS11       | -1091.541202 | 10.8                      |
| 23  | 24a        | -1091.541477 | 10.1                      |
| 24  | TS12       | -1091.488665 | 148.7                     |
| 25  | 24         | -1091.544972 | 0.9                       |
| 26  | TS13       | -1091.538241 | 18.6                      |
| 27  | 25         | -1091.547423 | -5.6                      |
| 28  | TS14       | -1091.521397 | 62.8                      |
| 29  | 26         | -1091.536030 | 24.4                      |
| 30  | TS15       | -1091.524255 | 55.2                      |
| 31  | 27         | -1091.585703 | -106.1                    |
| 32  | TS16       | -1091.497391 | 125.8                     |
| 33  | 28         | -1091.614602 | -181.9                    |
| 34  | TS17       | -1091.529209 | 42.3                      |
| 35  | 29         | -1091.600836 | -145.8                    |

**Computational data for all calculated ground states and transition structures (B3LYP/6-31G\*\*).**

**1: Dibenzoylketene 5a**

| Center<br>Number | Atomic<br>Number | Coordinates (Angstroms) |           |           |
|------------------|------------------|-------------------------|-----------|-----------|
|                  |                  | X                       | Y         | Z         |
| 1                | 6                | 0.729929                | 2.162673  | 0.136957  |
| 2                | 8                | 1.329114                | 3.127841  | 0.366899  |
| 3                | 6                | 0.015121                | 1.058643  | -0.117423 |
| 4                | 6                | 0.699050                | -0.176865 | -0.611056 |
| 5                | 8                | -1.870906               | 2.457461  | -0.389946 |
| 6                | 6                | -1.467385               | 1.317066  | -0.193291 |
| 7                | 6                | -2.422393               | 0.192411  | 0.032432  |
| 8                | 6                | -3.722150               | 0.340192  | -0.475180 |
| 9                | 6                | -4.680934               | -0.641612 | -0.245304 |
| 10               | 1                | -3.957788               | 1.232414  | -1.044841 |
| 11               | 6                | -3.071906               | -1.912213 | 1.039757  |
| 12               | 6                | -4.357374               | -1.769063 | 0.514015  |
| 13               | 1                | -5.681084               | -0.527295 | -0.652329 |
| 14               | 1                | -2.821973               | -2.782467 | 1.638935  |
| 15               | 1                | -5.106622               | -2.533530 | 0.698321  |
| 16               | 8                | 0.101203                | -0.956864 | -1.337057 |
| 17               | 6                | 2.128448                | -0.416486 | -0.233252 |
| 18               | 6                | 2.914607                | -1.180443 | -1.110144 |
| 19               | 6                | 2.688822                | 0.048589  | 0.965517  |
| 20               | 6                | 4.246654                | -1.443910 | -0.808847 |
| 21               | 1                | 2.459727                | -1.551759 | -2.022113 |
| 22               | 6                | 4.021689                | -0.227651 | 1.270996  |
| 23               | 1                | 2.079764                | 0.593650  | 1.679909  |
| 24               | 6                | 4.803038                | -0.966066 | 0.381833  |
| 25               | 1                | 4.853378                | -2.022960 | -1.498426 |
| 26               | 1                | 4.445352                | 0.126515  | 2.205695  |
| 27               | 1                | 5.842045                | -1.175723 | 0.618249  |
| 28               | 6                | -2.104784               | -0.940283 | 0.794055  |
| 29               | 1                | -1.110670               | -1.056254 | 1.211046  |

Energy = -841.3843552  
E+ZPVE = -841.168633

**2: Dibenzoylketene 6a**

| Center<br>Number | Atomic<br>Number | Coordinates (Angstroms) |           |           |
|------------------|------------------|-------------------------|-----------|-----------|
|                  |                  | X                       | Y         | Z         |
| 1                | 6                | 0.000057                | -1.142628 | -0.000067 |
| 2                | 8                | 0.000238                | -2.308273 | 0.000090  |
| 3                | 6                | 0.000021                | 0.187898  | -0.000268 |
| 4                | 6                | -1.254202               | 0.948418  | -0.356615 |
| 5                | 8                | 1.163559                | 2.044500  | 0.877154  |
| 6                | 6                | 1.254176                | 0.948439  | 0.356484  |
| 7                | 6                | 2.586352                | 0.315555  | 0.100486  |
| 8                | 6                | 3.661972                | 0.711240  | 0.911335  |
| 9                | 6                | 4.926183                | 0.165710  | 0.714815  |
| 10               | 1                | 3.480468                | 1.444701  | 1.689538  |
| 11               | 6                | 4.077949                | -1.143674 | -1.134737 |
| 12               | 6                | 5.135837                | -0.764637 | -0.307927 |
| 13               | 1                | 5.750717                | 0.465576  | 1.354539  |
| 14               | 1                | 4.242935                | -1.849028 | -1.943370 |
| 15               | 1                | 6.124266                | -1.186764 | -0.463853 |
| 16               | 8                | -1.163855               | 2.044594  | -0.877094 |
| 17               | 6                | -2.586354               | 0.315476  | -0.100517 |
| 18               | 6                | -3.661958               | 0.710992  | -0.911440 |
| 19               | 6                | -2.806159               | -0.607723 | 0.931772  |
| 20               | 6                | -4.926176               | 0.165490  | -0.714880 |
| 21               | 1                | -3.480429               | 1.444247  | -1.689835 |
| 22               | 6                | -4.077947               | -1.143523 | 1.134917  |
| 23               | 1                | -1.998144               | -0.880890 | 1.602648  |
| 24               | 6                | -5.135831               | -0.764658 | 0.308029  |
| 25               | 1                | -5.750640               | 0.465117  | -1.354801 |
| 26               | 1                | -4.242896               | -1.848791 | 1.943634  |
| 27               | 1                | -6.124271               | -1.186729 | 0.464034  |
| 28               | 6                | 2.806133                | -0.607887 | -0.931587 |
| 29               | 1                | 1.998133                | -0.880931 | -1.602533 |

Energy = -841.3828547

E+ZPVE = -841.167108

### 3: TS3 connecting 5a and 6a

| Center<br>Number | Atomic<br>Number | Coordinates (Angstroms) |          |           |
|------------------|------------------|-------------------------|----------|-----------|
|                  |                  | X                       | Y        | Z         |
| 1                | 6                | -1.183364               | 1.357962 | -0.104628 |
| 2                | 8                | -1.576247               | 2.480298 | -0.194868 |
| 3                | 6                | 0.004967                | 0.576964 | -0.042817 |

|    |   |           |           |           |
|----|---|-----------|-----------|-----------|
| 4  | 6 | 1.386658  | 1.107479  | -0.037431 |
| 5  | 6 | 2.607798  | 0.234719  | -0.013366 |
| 6  | 6 | 2.599105  | -1.161317 | -0.149364 |
| 7  | 6 | 3.838784  | 0.896932  | 0.137444  |
| 8  | 6 | 3.798384  | -1.874862 | -0.132206 |
| 9  | 1 | 1.670094  | -1.704100 | -0.266750 |
| 10 | 6 | 5.030890  | 0.182403  | 0.158893  |
| 11 | 1 | 3.827261  | 1.976864  | 0.233175  |
| 12 | 6 | 5.013744  | -1.208890 | 0.023209  |
| 13 | 1 | 3.779384  | -2.955328 | -0.240354 |
| 14 | 1 | 5.974312  | 0.706741  | 0.279808  |
| 15 | 1 | 5.944064  | -1.769645 | 0.038541  |
| 16 | 6 | -0.632046 | -0.678056 | 0.053324  |
| 17 | 8 | -0.468376 | -1.857199 | 0.143062  |
| 18 | 6 | -2.278680 | 0.026188  | -0.002964 |
| 19 | 6 | -2.988408 | -0.278599 | -1.201343 |
| 20 | 6 | -2.983194 | -0.088167 | 1.231187  |
| 21 | 6 | -4.312688 | -0.682671 | -1.165094 |
| 22 | 1 | -2.470373 | -0.190440 | -2.152781 |
| 23 | 6 | -4.307487 | -0.493002 | 1.264575  |
| 24 | 1 | -2.460826 | 0.146889  | 2.154915  |
| 25 | 6 | -4.971520 | -0.790932 | 0.067172  |
| 26 | 1 | -4.841225 | -0.914248 | -2.084462 |
| 27 | 1 | -4.831474 | -0.578878 | 2.211257  |
| 28 | 1 | -6.009826 | -1.108536 | 0.094051  |
| 29 | 8 | 1.504741  | 2.331123  | -0.046562 |

Energy = -841.3325991

E+ZPVE = -841.118614

Imaginary frequency: -406.5 cm<sup>-1</sup>

#### 4: Benzoyl(phenylimidoyl)lketene 13a

| Center<br>Number | Atomic<br>Number | Coordinates (Angstroms) |           |           |
|------------------|------------------|-------------------------|-----------|-----------|
|                  |                  | X                       | Y         | Z         |
| 1                | 6                | -0.749691               | 2.183214  | 0.158789  |
| 2                | 8                | -1.390058               | 3.115818  | 0.415524  |
| 3                | 7                | 1.821675                | 2.565987  | -0.441512 |
| 4                | 1                | 2.841056                | 2.641550  | -0.389075 |
| 5                | 6                | -0.012339               | 1.099936  | -0.122429 |
| 6                | 6                | 1.455498                | 1.354743  | -0.215361 |
| 7                | 6                | 2.394720                | 0.220568  | 0.028237  |
| 8                | 6                | 2.159666                | -0.719650 | 1.041073  |
| 9                | 6                | 3.579445                | 0.135566  | -0.717447 |

|    |   |           |           |           |
|----|---|-----------|-----------|-----------|
| 10 | 6 | 3.098649  | -1.711438 | 1.314785  |
| 11 | 1 | 1.245890  | -0.662704 | 1.624359  |
| 12 | 6 | 4.511910  | -0.865118 | -0.451897 |
| 13 | 1 | 3.754195  | 0.840762  | -1.524860 |
| 14 | 6 | 4.276117  | -1.788245 | 0.568233  |
| 15 | 1 | 2.910092  | -2.426894 | 2.109622  |
| 16 | 1 | 5.418661  | -0.928397 | -1.046046 |
| 17 | 1 | 5.002936  | -2.567804 | 0.776329  |
| 18 | 6 | -0.659150 | -0.156500 | -0.595437 |
| 19 | 8 | -0.025813 | -0.944890 | -1.283731 |
| 20 | 6 | -2.090670 | -0.425073 | -0.241716 |
| 21 | 6 | -2.842523 | -1.212835 | -1.127175 |
| 22 | 6 | -2.684824 | 0.033720  | 0.942853  |
| 23 | 6 | -4.173953 | -1.505071 | -0.849836 |
| 24 | 1 | -2.361382 | -1.580891 | -2.026932 |
| 25 | 6 | -4.016907 | -0.270693 | 1.224674  |
| 26 | 1 | -2.103067 | 0.597684  | 1.665077  |
| 27 | 6 | -4.764398 | -1.032337 | 0.326231  |
| 28 | 1 | -4.753480 | -2.103045 | -1.546749 |
| 29 | 1 | -4.466181 | 0.079910  | 2.148802  |
| 30 | 1 | -5.802762 | -1.264228 | 0.544249  |

Energy = -821.5051423

E+ZPVE = -821.276866

### 5: Benzoyl(phenylimidoyl)lketene 14a

| Center<br>Number | Atomic<br>Number | Coordinates (Angstroms) |           |           |
|------------------|------------------|-------------------------|-----------|-----------|
|                  |                  | X                       | Y         | Z         |
| 1                | 6                | -0.015127               | -1.095607 | -0.095313 |
| 2                | 8                | -0.019428               | -2.260657 | -0.051698 |
| 3                | 7                | -1.135645               | 2.084755  | -1.094750 |
| 4                | 1                | -2.056988               | 2.507596  | -1.240160 |
| 5                | 6                | -0.007558               | 0.236462  | -0.123379 |
| 6                | 6                | -1.261016               | 0.965722  | -0.488670 |
| 7                | 6                | -2.567744               | 0.322562  | -0.142036 |
| 8                | 6                | -2.768399               | -0.308804 | 1.095371  |
| 9                | 6                | -3.632406               | 0.377811  | -1.055579 |
| 10               | 6                | -4.008797               | -0.860034 | 1.414772  |
| 11               | 1                | -1.958797               | -0.342372 | 1.817786  |
| 12               | 6                | -4.867307               | -0.184116 | -0.739881 |
| 13               | 1                | -3.477892               | 0.842673  | -2.025123 |
| 14               | 6                | -5.059218               | -0.802366 | 0.497743  |

|    |   |           |           |           |
|----|---|-----------|-----------|-----------|
| 15 | 1 | -4.154979 | -1.332057 | 2.381672  |
| 16 | 1 | -5.677593 | -0.146634 | -1.461845 |
| 17 | 1 | -6.022107 | -1.239653 | 0.744291  |
| 18 | 6 | 1.239072  | 0.973293  | 0.300282  |
| 19 | 8 | 1.151065  | 2.063079  | 0.835129  |
| 20 | 6 | 2.569503  | 0.314712  | 0.097497  |
| 21 | 6 | 3.612338  | 0.667547  | 0.968567  |
| 22 | 6 | 2.819852  | -0.590733 | -0.943435 |
| 23 | 6 | 4.872335  | 0.097137  | 0.822142  |
| 24 | 1 | 3.408677  | 1.388598  | 1.752914  |
| 25 | 6 | 4.088037  | -1.151931 | -1.095844 |
| 26 | 1 | 2.038674  | -0.829583 | -1.657738 |
| 27 | 6 | 5.111830  | -0.815711 | -0.209957 |
| 28 | 1 | 5.670647  | 0.363753  | 1.508279  |
| 29 | 1 | 4.277143  | -1.843463 | -1.911201 |
| 30 | 1 | 6.097260  | -1.257181 | -0.326758 |

-----  
Energy = -821.5001077  
E+ZPVE = -821.272032

#### 6: TS4 connecting 13a and 14a

| Center<br>Number | Atomic<br>Number | Coordinates (Angstroms) |           |           |
|------------------|------------------|-------------------------|-----------|-----------|
|                  |                  | X                       | Y         | Z         |
| 1                | 6                | 1.209628                | 1.391947  | -0.362597 |
| 2                | 8                | 1.689316                | 2.425220  | -0.713121 |
| 3                | 7                | -1.525662               | 2.549567  | -0.232443 |
| 4                | 1                | -2.520383               | 2.787468  | -0.288130 |
| 5                | 6                | -0.020994               | 0.742803  | -0.101133 |
| 6                | 6                | -1.390749               | 1.273491  | -0.136396 |
| 7                | 6                | -2.536215               | 0.311565  | -0.055113 |
| 8                | 6                | -2.542450               | -0.893792 | -0.771619 |
| 9                | 6                | -3.659306               | 0.644733  | 0.718113  |
| 10               | 6                | -3.652852               | -1.735530 | -0.729526 |
| 11               | 1                | -1.683827               | -1.167132 | -1.375444 |
| 12               | 6                | -4.763605               | -0.203174 | 0.770137  |
| 13               | 1                | -3.652800               | 1.564169  | 1.296726  |
| 14               | 6                | -4.764574               | -1.394617 | 0.042297  |
| 15               | 1                | -3.648461               | -2.660015 | -1.299246 |
| 16               | 1                | -5.619805               | 0.062694  | 1.383084  |
| 17               | 1                | -5.625031               | -2.056124 | 0.080615  |
| 18               | 6                | 0.512416                | -0.508470 | 0.263542  |
| 19               | 8                | 0.237953                | -1.614051 | 0.620150  |

|    |   |          |           |           |
|----|---|----------|-----------|-----------|
| 20 | 6 | 2.209045 | 0.002901  | 0.018724  |
| 21 | 6 | 2.953438 | 0.117441  | 1.227676  |
| 22 | 6 | 2.850318 | -0.611326 | -1.094992 |
| 23 | 6 | 4.252151 | -0.357939 | 1.318504  |
| 24 | 1 | 2.483372 | 0.586825  | 2.088033  |
| 25 | 6 | 4.148783 | -1.086375 | -1.002888 |
| 26 | 1 | 2.301610 | -0.703906 | -2.028777 |
| 27 | 6 | 4.849676 | -0.960139 | 0.203812  |
| 28 | 1 | 4.806712 | -0.265237 | 2.247118  |
| 29 | 1 | 4.624348 | -1.553624 | -1.859654 |
| 30 | 1 | 5.867494 | -1.332555 | 0.275296  |

Energy = -821.4513864

E+ZPVE = -821.225179

Imaginary frequency: -415.6 cm<sup>-1</sup>

### 7: Benzoyl(phenylimidoyl)lketene 14b

| Center<br>Number | Atomic<br>Number | Coordinates (Angstroms) |           |           |
|------------------|------------------|-------------------------|-----------|-----------|
|                  |                  | X                       | Y         | Z         |
| 1                | 6                | -0.743555               | 2.097806  | -0.234694 |
| 2                | 8                | -1.340084               | 3.022378  | -0.602328 |
| 3                | 7                | -0.082191               | -0.864123 | 1.572849  |
| 4                | 1                | -0.653029               | -1.665358 | 1.855644  |
| 5                | 6                | -0.025648               | 1.032149  | 0.146723  |
| 6                | 6                | -0.721279               | -0.147794 | 0.722718  |
| 7                | 6                | -2.133735               | -0.399662 | 0.292191  |
| 8                | 6                | -2.529213               | -0.261994 | -1.047604 |
| 9                | 6                | -3.083046               | -0.815039 | 1.239731  |
| 10               | 6                | -3.840086               | -0.544695 | -1.431101 |
| 11               | 1                | -1.802722               | 0.043046  | -1.794685 |
| 12               | 6                | -4.394428               | -1.086372 | 0.857017  |
| 13               | 1                | -2.792529               | -0.898408 | 2.283035  |
| 14               | 6                | -4.775540               | -0.954467 | -0.480388 |
| 15               | 1                | -4.128860               | -0.446932 | -2.473207 |
| 16               | 1                | -5.121559               | -1.392583 | 1.603038  |
| 17               | 1                | -5.797867               | -1.166545 | -0.778531 |
| 18               | 6                | 1.453219                | 1.309116  | 0.172971  |
| 19               | 8                | 1.846987                | 2.465074  | 0.285150  |
| 20               | 6                | 2.425012                | 0.190300  | -0.019566 |
| 21               | 6                | 3.736322                | 0.391320  | 0.435626  |
| 22               | 6                | 2.110391                | -0.986166 | -0.712452 |
| 23               | 6                | 4.710649                | -0.579584 | 0.222705  |



|    |   |          |           |           |
|----|---|----------|-----------|-----------|
| 24 | 1 | 3.969519 | 1.316713  | 0.950732  |
| 25 | 6 | 3.091770 | -1.947415 | -0.943373 |
| 26 | 1 | 1.104176 | -1.145051 | -1.083477 |
| 27 | 6 | 4.390365 | -1.750167 | -0.469166 |
| 28 | 1 | 5.720608 | -0.422321 | 0.589414  |
| 29 | 1 | 2.843619 | -2.851622 | -1.491153 |
| 30 | 1 | 5.151563 | -2.505707 | -0.641367 |

Energy = -821.273235  
E+ZPVE = -821.5013211

### 8: Ketenimine 15a

| Center<br>Number | Atomic<br>Number | Coordinates (Angstroms) |           |           |
|------------------|------------------|-------------------------|-----------|-----------|
|                  |                  | X                       | Y         | Z         |
| 1                | 6                | -0.673372               | 2.249410  | -0.236841 |
| 2                | 6                | -0.001499               | 1.157614  | 0.130588  |
| 3                | 6                | 1.496672                | 1.333255  | 0.234162  |
| 4                | 8                | -0.125901               | -0.706903 | 1.557410  |
| 5                | 6                | -0.699422               | -0.029747 | 0.714293  |
| 6                | 8                | 1.965185                | 2.435980  | 0.483942  |
| 7                | 6                | 2.386924                | 0.162726  | -0.029984 |
| 8                | 6                | 3.708558                | 0.233239  | 0.435969  |
| 9                | 6                | 1.981823                | -0.948917 | -0.781164 |
| 10               | 6                | 4.601827                | -0.800738 | 0.174139  |
| 11               | 1                | 4.011583                | 1.108551  | 1.000026  |
| 12               | 6                | 2.882094                | -1.975876 | -1.056859 |
| 13               | 1                | 0.969778                | -1.005741 | -1.167550 |
| 14               | 6                | 4.190115                | -1.907158 | -0.573779 |
| 15               | 1                | 5.619746                | -0.744855 | 0.548267  |
| 16               | 1                | 2.562835                | -2.829804 | -1.646586 |
| 17               | 1                | 4.888268                | -2.712840 | -0.781893 |
| 18               | 7                | -1.245611               | 3.215537  | -0.696486 |
| 19               | 1                | -1.533676               | 3.976205  | -0.082058 |
| 20               | 6                | -2.096775               | -0.361611 | 0.287729  |
| 21               | 6                | -2.623862               | 0.001851  | -0.960239 |
| 22               | 6                | -2.883112               | -1.117520 | 1.171983  |
| 23               | 6                | -3.921764               | -0.371514 | -1.309409 |
| 24               | 1                | -2.017651               | 0.553920  | -1.670229 |
| 25               | 6                | -4.181424               | -1.477779 | 0.826466  |
| 26               | 1                | -2.452368               | -1.409372 | 2.123737  |
| 27               | 6                | -4.703682               | -1.104146 | -0.415605 |
| 28               | 1                | -4.319021               | -0.094398 | -2.281163 |

|    |   |           |           |           |
|----|---|-----------|-----------|-----------|
| 29 | 1 | -4.787214 | -2.052372 | 1.520782  |
| 30 | 1 | -5.715892 | -1.389189 | -0.687436 |

---

Energy = -821.4990054  
E+ZPVE = -821.271875

### 9: TS5 connecting 14a and 15a

---

| Center<br>Number | Atomic<br>Number | Coordinates (Angstroms) |           |           |
|------------------|------------------|-------------------------|-----------|-----------|
|                  |                  | X                       | Y         | Z         |
| 1                | 6                | -0.630554               | -0.699056 | -0.000084 |
| 2                | 8                | -0.430194               | -1.887716 | 0.000107  |
| 3                | 7                | -1.589908               | 2.516355  | -0.001500 |
| 4                | 1                | -2.583250               | 2.713495  | -0.001578 |
| 5                | 6                | 0.006992                | 0.554264  | -0.000491 |
| 6                | 6                | -1.183250               | 1.343776  | -0.000860 |
| 7                | 6                | -2.237107               | -0.099288 | -0.000068 |
| 8                | 6                | -2.955790               | -0.268996 | 1.220695  |
| 9                | 6                | -2.956405               | -0.270166 | -1.220309 |
| 10               | 6                | -4.309412               | -0.563304 | 1.219506  |
| 11               | 1                | -2.420239               | -0.155414 | 2.159493  |
| 12               | 6                | -4.310022               | -0.564464 | -1.218148 |
| 13               | 1                | -2.421334               | -0.157497 | -2.159492 |
| 14               | 6                | -4.987345               | -0.708314 | 0.000922  |
| 15               | 1                | -4.845533               | -0.684587 | 2.155603  |
| 16               | 1                | -4.846621               | -0.686637 | -2.153855 |
| 17               | 1                | -6.048717               | -0.938930 | 0.001297  |
| 18               | 6                | 1.374446                | 1.105574  | -0.000326 |
| 19               | 8                | 1.486373                | 2.331626  | -0.000370 |
| 20               | 6                | 2.608440                | 0.245146  | -0.000022 |
| 21               | 6                | 3.836843                | 0.928850  | 0.001131  |
| 22               | 6                | 2.612183                | -1.157309 | -0.000994 |
| 23               | 6                | 5.038882                | 0.230605  | 0.001307  |
| 24               | 1                | 3.814016                | 2.012843  | 0.001820  |
| 25               | 6                | 3.821448                | -1.854911 | -0.000866 |
| 26               | 1                | 1.683836                | -1.715343 | -0.001673 |
| 27               | 6                | 5.034604                | -1.167351 | 0.000275  |
| 28               | 1                | 5.980108                | 0.772921  | 0.002235  |
| 29               | 1                | 3.811435                | -2.941098 | -0.001643 |
| 30               | 1                | 5.972496                | -1.715863 | 0.000383  |

---

Energy = -821.4375447

E+ZPVE = -821.212449

Imaginary frequency: - 458.6 cm<sup>-1</sup>

### 10: Oxetone 32

| Center<br>Number | Atomic<br>Number | Coordinates (Angstroms) |           |           |
|------------------|------------------|-------------------------|-----------|-----------|
|                  |                  | X                       | Y         | Z         |
| 1                | 6                | 1.291565                | 0.725707  | -0.118746 |
| 2                | 6                | -0.281297               | 1.870252  | -0.295223 |
| 3                | 6                | -0.058209               | 0.424723  | -0.104579 |
| 4                | 6                | 2.587830                | 0.112757  | -0.015037 |
| 5                | 6                | 2.726417                | -1.285299 | 0.105921  |
| 6                | 6                | 3.731177                | 0.939032  | -0.032747 |
| 7                | 6                | 3.999351                | -1.836367 | 0.212716  |
| 8                | 1                | 1.829502                | -1.899621 | 0.103954  |
| 9                | 6                | 4.994918                | 0.372444  | 0.074870  |
| 10               | 1                | 3.607293                | 2.011983  | -0.128125 |
| 11               | 6                | 5.129878                | -1.014444 | 0.198423  |
| 12               | 1                | 4.112524                | -2.912181 | 0.304867  |
| 13               | 1                | 5.875680                | 1.006797  | 0.062627  |
| 14               | 1                | 6.119614                | -1.454405 | 0.281376  |
| 15               | 8                | -1.107299               | 2.713444  | -0.419107 |
| 16               | 6                | -0.906840               | -0.751708 | -0.015684 |
| 17               | 6                | -2.389267               | -0.543328 | 0.041851  |
| 18               | 6                | -2.966463               | 0.451733  | 0.843761  |
| 19               | 6                | -3.230392               | -1.398219 | -0.688115 |
| 20               | 6                | -4.352628               | 0.576034  | 0.925596  |
| 21               | 1                | -2.333740               | 1.121972  | 1.414307  |
| 22               | 6                | -4.615072               | -1.264870 | -0.614996 |
| 23               | 1                | -2.791908               | -2.153214 | -1.334573 |
| 24               | 6                | -5.179939               | -0.278985 | 0.196450  |
| 25               | 1                | -4.785775               | 1.344449  | 1.558710  |
| 26               | 1                | -5.252264               | -1.924739 | -1.196275 |
| 27               | 1                | -6.259251               | -0.174176 | 0.255229  |
| 28               | 8                | 1.179999                | 2.102996  | -0.289861 |
| 29               | 7                | -0.358790               | -1.921889 | -0.004714 |
| 30               | 1                | -1.077917               | -2.641932 | 0.095891  |

Energy = -821.4979415

E+ZPVE = -821.268717

### 11: Azetinone 33

| Center<br>Number | Atomic<br>Number | Coordinates (Angstroms) |           |           |
|------------------|------------------|-------------------------|-----------|-----------|
|                  |                  | X                       | Y         | Z         |
| 1                | 6                | -1.314133               | 0.818768  | 0.012715  |
| 2                | 6                | 0.186851                | 2.118072  | -0.089713 |
| 3                | 6                | 0.062273                | 0.623381  | -0.075044 |
| 4                | 6                | -2.556642               | 0.081074  | 0.022417  |
| 5                | 6                | -2.614079               | -1.297014 | -0.271479 |
| 6                | 6                | -3.749297               | 0.775754  | 0.320619  |
| 7                | 6                | -3.842607               | -1.949759 | -0.279162 |
| 8                | 1                | -1.688121               | -1.822963 | -0.471338 |
| 9                | 6                | -4.969475               | 0.111450  | 0.314881  |
| 10               | 1                | -3.705815               | 1.828107  | 0.581318  |
| 11               | 6                | -5.018259               | -1.252176 | 0.009980  |
| 12               | 1                | -3.883346               | -3.010163 | -0.507960 |
| 13               | 1                | -5.881048               | 0.651110  | 0.551716  |
| 14               | 1                | -5.972450               | -1.771042 | 0.004529  |
| 15               | 7                | -1.248618               | 2.240743  | 0.153168  |
| 16               | 1                | -1.799523               | 2.843892  | -0.456469 |
| 17               | 8                | 0.992487                | 2.990604  | -0.272254 |
| 18               | 8                | 0.358984                | -1.689090 | -0.097775 |
| 19               | 6                | 0.900558                | -0.576849 | -0.059408 |
| 20               | 6                | 2.396509                | -0.497754 | 0.002303  |
| 21               | 6                | 3.130321                | 0.696767  | -0.058842 |
| 22               | 6                | 3.085685                | -1.717458 | 0.123402  |
| 23               | 6                | 4.524143                | 0.664352  | 0.003083  |
| 24               | 1                | 2.630878                | 1.652215  | -0.165159 |
| 25               | 6                | 4.473769                | -1.743966 | 0.189481  |
| 26               | 1                | 2.503453                | -2.631062 | 0.163840  |
| 27               | 6                | 5.198536                | -0.549834 | 0.129597  |
| 28               | 1                | 5.082571                | 1.594407  | -0.048513 |
| 29               | 1                | 4.993418                | -2.692747 | 0.286921  |
| 30               | 1                | 6.283633                | -0.567912 | 0.180184  |

Energy = -821.5097326

E+ZPVE = -821.280092

## 12: TS6 connecting 13a and 33

| Center<br>Number | Atomic<br>Number | Coordinates (Angstroms) |          |           |
|------------------|------------------|-------------------------|----------|-----------|
|                  |                  | X                       | Y        | Z         |
| 1                | 6                | 1.327493                | 0.859501 | -0.175433 |

|    |   |           |           |           |
|----|---|-----------|-----------|-----------|
| 2  | 6 | -0.492758 | 1.802748  | -0.378951 |
| 3  | 6 | -0.051468 | 0.475682  | -0.195249 |
| 4  | 6 | 2.595750  | 0.156274  | -0.020229 |
| 5  | 6 | 2.681693  | -1.245966 | 0.041624  |
| 6  | 6 | 3.765781  | 0.937608  | 0.068692  |
| 7  | 6 | 3.928298  | -1.849100 | 0.196688  |
| 8  | 1 | 1.771574  | -1.834105 | -0.045718 |
| 9  | 6 | 5.001804  | 0.324253  | 0.224388  |
| 10 | 1 | 3.678669  | 2.017150  | 0.016453  |
| 11 | 6 | 5.083808  | -1.071182 | 0.289419  |
| 12 | 1 | 3.997980  | -2.931686 | 0.242526  |
| 13 | 1 | 5.901711  | 0.927369  | 0.295248  |
| 14 | 1 | 6.051494  | -1.550073 | 0.410401  |
| 15 | 8 | -1.270604 | 2.660325  | -0.530931 |
| 16 | 6 | -0.874620 | -0.727672 | -0.134737 |
| 17 | 6 | -2.354529 | -0.536568 | 0.023054  |
| 18 | 6 | -2.887026 | 0.299280  | 1.015186  |
| 19 | 6 | -3.231918 | -1.257137 | -0.801714 |
| 20 | 6 | -4.267015 | 0.402920  | 1.184550  |
| 21 | 1 | -2.220174 | 0.853414  | 1.668248  |
| 22 | 6 | -4.611256 | -1.141801 | -0.640129 |
| 23 | 1 | -2.825857 | -1.892527 | -1.583592 |
| 24 | 6 | -5.131893 | -0.313535 | 0.355958  |
| 25 | 1 | -4.666276 | 1.044468  | 1.964318  |
| 26 | 1 | -5.279123 | -1.694151 | -1.294470 |
| 27 | 1 | -6.206611 | -0.224803 | 0.483814  |
| 28 | 8 | 1.306822  | 2.149204  | -0.316949 |
| 29 | 7 | -0.333677 | -1.895181 | -0.224586 |
| 30 | 1 | -1.050275 | -2.616858 | -0.120791 |

Energy = -821.4944865

E+ZPVE = -821.266448

Imaginary frequency: -228.1 cm<sup>-1</sup>

### 13: TS7 connecting 14b and 32

| Center<br>Number | Atomic<br>Number | Coordinates (Angstroms) |          |           |
|------------------|------------------|-------------------------|----------|-----------|
|                  |                  | X                       | Y        | Z         |
| 1                | 6                | 0.537807                | 1.915445 | -0.527552 |
| 2                | 8                | 1.328835                | 2.713477 | -0.847186 |
| 3                | 7                | -1.335481               | 2.294782 | -0.258253 |
| 4                | 1                | -2.183288               | 2.813681 | -0.468364 |
| 5                | 6                | 0.056285                | 0.632994 | -0.223739 |

|    |   |           |           |           |
|----|---|-----------|-----------|-----------|
| 6  | 6 | -1.357511 | 0.987616  | -0.141838 |
| 7  | 6 | -2.574555 | 0.178686  | 0.018099  |
| 8  | 6 | -3.734526 | 0.802019  | 0.518750  |
| 9  | 6 | -2.626856 | -1.177030 | -0.345641 |
| 10 | 6 | -4.922484 | 0.090619  | 0.639345  |
| 11 | 1 | -3.692568 | 1.837271  | 0.843618  |
| 12 | 6 | -3.825431 | -1.880196 | -0.232857 |
| 13 | 1 | -1.722342 | -1.664515 | -0.688885 |
| 14 | 6 | -4.971681 | -1.252848 | 0.255614  |
| 15 | 1 | -5.806777 | 0.578093  | 1.038172  |
| 16 | 1 | -3.859472 | -2.926086 | -0.522104 |
| 17 | 1 | -5.899797 | -1.809363 | 0.348508  |
| 18 | 6 | 0.834292  | -0.593278 | -0.106966 |
| 19 | 8 | 0.307766  | -1.709159 | -0.173122 |
| 20 | 6 | 2.324777  | -0.504346 | 0.068437  |
| 21 | 6 | 3.101787  | -1.540303 | -0.472369 |
| 22 | 6 | 2.955413  | 0.511883  | 0.799142  |
| 23 | 6 | 4.484445  | -1.540839 | -0.316031 |
| 24 | 1 | 2.598282  | -2.337094 | -1.009157 |
| 25 | 6 | 4.339895  | 0.501672  | 0.969042  |
| 26 | 1 | 2.368200  | 1.297632  | 1.261792  |
| 27 | 6 | 5.107000  | -0.518006 | 0.405055  |
| 28 | 1 | 5.078301  | -2.339597 | -0.750630 |
| 29 | 1 | 4.817368  | 1.288031  | 1.545929  |
| 30 | 1 | 6.185709  | -0.520605 | 0.532417  |

Energy = -821.4924535

E+ZPVE = -821.265164

Imaginary frequency: - 319.6cm<sup>-1</sup>

#### 14: Benzoyl(phenyl)acetylene 34

| Center<br>Number | Atomic<br>Number | Coordinates (Angstroms) |           |           |
|------------------|------------------|-------------------------|-----------|-----------|
|                  |                  | X                       | Y         | Z         |
| 1                | 6                | 0.008811                | 0.837505  | -0.000627 |
| 2                | 6                | -1.156632               | 0.487728  | -0.000890 |
| 3                | 6                | -2.527943               | 0.100946  | -0.000474 |
| 4                | 6                | -3.538876               | 1.082843  | -0.000613 |
| 5                | 6                | -2.891510               | -1.260174 | 0.000161  |
| 6                | 6                | -4.878600               | 0.707024  | -0.000018 |
| 7                | 1                | -3.257102               | 2.130422  | -0.001164 |
| 8                | 6                | -4.234064               | -1.625915 | 0.000756  |
| 9                | 1                | -2.113951               | -2.016904 | 0.000189  |

|    |   |           |           |           |
|----|---|-----------|-----------|-----------|
| 10 | 6 | -5.229295 | -0.645401 | 0.000695  |
| 11 | 1 | -5.651305 | 1.469692  | -0.000097 |
| 12 | 1 | -4.505805 | -2.677115 | 0.001264  |
| 13 | 1 | -6.275914 | -0.934809 | 0.001189  |
| 14 | 6 | 1.370698  | 1.339234  | -0.000035 |
| 15 | 8 | 1.582009  | 2.548212  | 0.000560  |
| 16 | 6 | 2.481687  | 0.340331  | -0.000045 |
| 17 | 6 | 3.801553  | 0.816452  | 0.000546  |
| 18 | 6 | 2.243068  | -1.040588 | -0.000592 |
| 19 | 6 | 4.866455  | -0.078265 | 0.000607  |
| 20 | 1 | 3.961195  | 1.889299  | 0.000921  |
| 21 | 6 | 3.311746  | -1.935359 | -0.000543 |
| 22 | 1 | 1.220978  | -1.405521 | -0.001073 |
| 23 | 6 | 4.622928  | -1.455601 | 0.000085  |
| 24 | 1 | 5.887037  | 0.292804  | 0.001052  |
| 25 | 1 | 3.123203  | -3.004750 | -0.000979 |
| 26 | 1 | 5.455434  | -2.153364 | 0.000144  |

Energy = -652.8005046  
E+ZPVE = -652.599115

### 15: Isocyanic acid 35

| Center<br>Number | Atomic<br>Number | Coordinates (Angstroms) |           |          |
|------------------|------------------|-------------------------|-----------|----------|
|                  |                  | X                       | Y         | Z        |
| 1                | 7                | 0.477185                | -1.071224 | 0.000000 |
| 2                | 1                | 1.464563                | -1.273247 | 0.000000 |
| 3                | 6                | 0.000000                | 0.049803  | 0.000000 |
| 4                | 8                | -0.600607               | 1.059124  | 0.000000 |

Energy = -168.681499  
E+ZPVE = -168.660183

### 16: TS8 connecting 33 and 34+35

| Center<br>Number | Atomic<br>Number | Coordinates (Angstroms) |          |           |
|------------------|------------------|-------------------------|----------|-----------|
|                  |                  | X                       | Y        | Z         |
| 1                | 6                | -1.186514               | 0.242690 | -0.238278 |
| 2                | 6                | 0.181342                | 2.089801 | -0.487929 |
| 3                | 6                | 0.024614                | 0.466744 | -0.560368 |

|    |   |           |           |           |
|----|---|-----------|-----------|-----------|
| 4  | 7 | -0.727598 | 2.494812  | 0.380931  |
| 5  | 1 | -0.770089 | 3.521221  | 0.364221  |
| 6  | 8 | 1.005759  | 2.615324  | -1.217879 |
| 7  | 6 | -2.503968 | -0.134446 | 0.051998  |
| 8  | 6 | -2.971105 | -0.150545 | 1.387996  |
| 9  | 6 | -3.361019 | -0.539614 | -0.998886 |
| 10 | 6 | -4.263059 | -0.574907 | 1.658793  |
| 11 | 1 | -2.312356 | 0.196927  | 2.175538  |
| 12 | 6 | -4.649980 | -0.969517 | -0.709496 |
| 13 | 1 | -2.992268 | -0.519253 | -2.018589 |
| 14 | 6 | -5.100396 | -0.987038 | 0.614040  |
| 15 | 1 | -4.626791 | -0.583722 | 2.681234  |
| 16 | 1 | -5.306905 | -1.287385 | -1.512630 |
| 17 | 1 | -6.110803 | -1.318548 | 0.833994  |
| 18 | 6 | 1.133617  | -0.440750 | -1.043035 |
| 19 | 8 | 0.985843  | -1.075133 | -2.071121 |
| 20 | 6 | 2.369000  | -0.488754 | -0.219480 |
| 21 | 6 | 2.481240  | 0.203710  | 0.995197  |
| 22 | 6 | 3.441102  | -1.270765 | -0.679319 |
| 23 | 6 | 3.655193  | 0.112524  | 1.740707  |
| 24 | 1 | 1.656409  | 0.810727  | 1.354555  |
| 25 | 6 | 4.610683  | -1.356245 | 0.066928  |
| 26 | 1 | 3.331596  | -1.796964 | -1.621422 |
| 27 | 6 | 4.718630  | -0.664532 | 1.277980  |
| 28 | 1 | 3.741465  | 0.651005  | 2.679331  |
| 29 | 1 | 5.440148  | -1.958447 | -0.291268 |
| 30 | 1 | 5.633687  | -0.730917 | 1.859447  |

-----

Energy = -821.4216332  
E+ZPVE = -821.196527  
Imaginary frequency: - 254.0 cm<sup>-1</sup>

### 17: Toluoyl(phenylimido)ketene 21

| Center<br>Number | Atomic<br>Number | Coordinates (Angstroms) |           |           |
|------------------|------------------|-------------------------|-----------|-----------|
|                  |                  | X                       | Y         | Z         |
| 1                | 6                | 0.811580                | -1.881684 | 0.183344  |
| 2                | 8                | 1.083469                | -2.977016 | 0.453977  |
| 3                | 7                | -1.727269               | -1.309894 | -0.260253 |
| 4                | 6                | 0.516122                | -0.608814 | -0.119520 |
| 5                | 6                | -0.939938               | -0.296544 | -0.136036 |
| 6                | 6                | -1.340839               | 1.133919  | 0.032775  |
| 7                | 6                | -0.778624               | 1.913966  | 1.052698  |



|    |   |           |           |           |
|----|---|-----------|-----------|-----------|
| 8  | 6 | -2.291827 | 1.708745  | -0.821825 |
| 9  | 6 | -1.174516 | 3.238543  | 1.228419  |
| 10 | 1 | -0.034698 | 1.477969  | 1.713083  |
| 11 | 6 | -2.673402 | 3.037636  | -0.655278 |
| 12 | 1 | -2.723352 | 1.113891  | -1.619325 |
| 13 | 6 | -2.120625 | 3.804392  | 0.372581  |
| 14 | 1 | -0.739003 | 3.830100  | 2.028261  |
| 15 | 1 | -3.403272 | 3.475615  | -1.329497 |
| 16 | 1 | -2.422605 | 4.839439  | 0.502724  |
| 17 | 6 | 1.567321  | 0.296780  | -0.673262 |
| 18 | 8 | 1.245976  | 1.215992  | -1.413368 |
| 19 | 6 | -3.123434 | -1.262169 | -0.091885 |
| 20 | 6 | -3.924640 | -1.879975 | -1.066553 |
| 21 | 6 | -3.735896 | -0.741007 | 1.061089  |
| 22 | 6 | -5.307908 | -1.932508 | -0.913180 |
| 23 | 1 | -3.442630 | -2.309928 | -1.938925 |
| 24 | 6 | -5.118384 | -0.818712 | 1.217202  |
| 25 | 1 | -3.122281 | -0.287600 | 1.832426  |
| 26 | 6 | -5.912908 | -1.404631 | 0.229889  |
| 27 | 1 | -5.914396 | -2.400868 | -1.683232 |
| 28 | 1 | -5.576634 | -0.416865 | 2.116587  |
| 29 | 1 | -6.990069 | -1.459309 | 0.354831  |
| 30 | 6 | 3.002381  | 0.045218  | -0.334928 |
| 31 | 6 | 3.977419  | 0.480304  | -1.246729 |
| 32 | 6 | 3.418236  | -0.553274 | 0.862033  |
| 33 | 6 | 5.326523  | 0.287079  | -0.981126 |
| 34 | 1 | 3.650768  | 0.968348  | -2.158776 |
| 35 | 6 | 4.775101  | -0.733509 | 1.126735  |
| 36 | 1 | 2.689552  | -0.845879 | 1.611370  |
| 37 | 6 | 5.750690  | -0.328041 | 0.208416  |
| 38 | 1 | 6.068277  | 0.620225  | -1.702558 |
| 39 | 1 | 5.080256  | -1.187098 | 2.065851  |
| 40 | 6 | 7.217811  | -0.555567 | 0.477806  |
| 41 | 1 | 7.581423  | -1.441526 | -0.057271 |
| 42 | 1 | 7.821800  | 0.293410  | 0.143011  |
| 43 | 1 | 7.410727  | -0.713356 | 1.542338  |

-----

Energy = -1091.545307  
E+ZPVE = -1091.880874

### 18: Toluoyl(phenylimidoyl)ketene 22

-----

| Center<br>Number | Atomic<br>Number | Coordinates (Angstroms) |   |   |
|------------------|------------------|-------------------------|---|---|
|                  |                  | X                       | Y | Z |

---

|    |   |           |           |           |
|----|---|-----------|-----------|-----------|
| 1  | 6 | -1.021979 | 1.650874  | -0.326653 |
| 2  | 8 | -1.410591 | 2.696956  | -0.663196 |
| 3  | 7 | 1.163320  | -1.100319 | -0.186843 |
| 4  | 6 | -0.587103 | 0.458205  | 0.081566  |
| 5  | 6 | 0.866150  | 0.134619  | -0.026724 |
| 6  | 6 | 1.817038  | 1.295019  | 0.004416  |
| 7  | 6 | 1.696428  | 2.291485  | 0.985982  |
| 8  | 6 | 2.823219  | 1.416334  | -0.966992 |
| 9  | 6 | 2.571623  | 3.377167  | 1.004308  |
| 10 | 1 | 0.927408  | 2.203295  | 1.747660  |
| 11 | 6 | 3.685135  | 2.510235  | -0.956190 |
| 12 | 1 | 2.923615  | 0.652345  | -1.730274 |
| 13 | 6 | 3.564781  | 3.491166  | 0.031080  |
| 14 | 1 | 2.475484  | 4.133518  | 1.777532  |
| 15 | 1 | 4.452393  | 2.597311  | -1.719637 |
| 16 | 1 | 4.241159  | 4.340720  | 0.039738  |
| 17 | 6 | -1.559849 | -0.485019 | 0.749407  |
| 18 | 8 | -1.170591 | -1.233123 | 1.628243  |
| 19 | 6 | 2.468592  | -1.615685 | -0.150254 |
| 20 | 6 | 2.875113  | -2.470913 | -1.188501 |
| 21 | 6 | 3.333888  | -1.405841 | 0.937560  |
| 22 | 6 | 4.138042  | -3.057456 | -1.163522 |
| 23 | 1 | 2.187638  | -2.659743 | -2.007050 |
| 24 | 6 | 4.585688  | -2.017296 | 0.965132  |
| 25 | 1 | 3.008332  | -0.779482 | 1.761364  |
| 26 | 6 | 5.000497  | -2.835916 | -0.087094 |
| 27 | 1 | 4.443499  | -3.704044 | -1.981446 |
| 28 | 1 | 5.240610  | -1.851696 | 1.816073  |
| 29 | 1 | 5.978340  | -3.307146 | -0.062187 |
| 30 | 6 | -2.998773 | -0.441031 | 0.346957  |
| 31 | 6 | -3.956940 | -0.865537 | 1.282270  |
| 32 | 6 | -3.427928 | -0.047107 | -0.927187 |
| 33 | 6 | -5.306750 | -0.859717 | 0.959197  |
| 34 | 1 | -3.616204 | -1.195634 | 2.257825  |
| 35 | 6 | -4.784900 | -0.054981 | -1.247762 |
| 36 | 1 | -2.703697 | 0.228143  | -1.687078 |
| 37 | 6 | -5.746694 | -0.449936 | -0.310980 |
| 38 | 1 | -6.036573 | -1.180852 | 1.698144  |
| 39 | 1 | -5.099413 | 0.240896  | -2.244844 |
| 40 | 6 | -7.217913 | -0.429595 | -0.645419 |
| 41 | 1 | -7.383688 | -0.348442 | -1.722860 |
| 42 | 1 | -7.719951 | -1.335161 | -0.290108 |
| 43 | 1 | -7.716939 | 0.423091  | -0.168909 |

---

Energy = -1091.877171  
E+ZPVE = -1091.541747

**19: TS9 connecting 21 and 22**

| Center<br>Number | Atomic<br>Number | Coordinates (Angstroms) |           |           |
|------------------|------------------|-------------------------|-----------|-----------|
|                  |                  | X                       | Y         | Z         |
| 1                | 6                | 1.433882                | -1.219133 | 0.236840  |
| 2                | 8                | 1.471761                | -2.382660 | 0.500343  |
| 3                | 7                | -1.511798               | -1.258718 | -0.053596 |
| 4                | 6                | 0.544007                | -0.139505 | 0.006418  |
| 5                | 6                | -0.921342               | -0.112877 | -0.032169 |
| 6                | 6                | -1.583284               | 1.233625  | -0.083497 |
| 7                | 6                | -1.229425               | 2.244317  | 0.821266  |
| 8                | 6                | -2.558232               | 1.503136  | -1.055748 |
| 9                | 6                | -1.850663               | 3.491355  | 0.768632  |
| 10               | 1                | -0.471974               | 2.050059  | 1.574236  |
| 11               | 6                | -3.166693               | 2.754631  | -1.117419 |
| 12               | 1                | -2.836496               | 0.727901  | -1.761634 |
| 13               | 6                | -2.818290               | 3.750545  | -0.202664 |
| 14               | 1                | -1.573565               | 4.261772  | 1.482106  |
| 15               | 1                | -3.914732               | 2.952095  | -1.879533 |
| 16               | 1                | -3.296488               | 4.724603  | -0.249149 |
| 17               | 6                | 1.526879                | 0.846988  | -0.226743 |
| 18               | 8                | 1.694917                | 2.000922  | -0.486738 |
| 19               | 6                | 2.878824                | -0.274471 | 0.010680  |
| 20               | 6                | 3.605767                | -0.566202 | -1.181604 |
| 21               | 6                | 3.644660                | -0.034336 | 1.189242  |
| 22               | 6                | 4.987156                | -0.607892 | -1.192005 |
| 23               | 1                | 3.051422                | -0.754479 | -2.097550 |
| 24               | 6                | 5.026529                | -0.077042 | 1.172707  |
| 25               | 1                | 3.121851                | 0.189404  | 2.115733  |
| 26               | 6                | 5.723310                | -0.367149 | -0.015724 |
| 27               | 1                | 5.517327                | -0.827414 | -2.114747 |
| 28               | 1                | 5.587398                | 0.114246  | 2.083402  |
| 29               | 6                | 7.225700                | -0.446977 | -0.025810 |
| 30               | 1                | 7.666346                | 0.140145  | 0.784009  |
| 31               | 1                | 7.553046                | -1.486335 | 0.106163  |
| 32               | 1                | 7.639094                | -0.096890 | -0.975963 |
| 33               | 6                | -2.899798               | -1.439762 | 0.047615  |
| 34               | 6                | -3.520384               | -2.305969 | -0.869705 |
| 35               | 6                | -3.669142               | -0.898237 | 1.093265  |
| 36               | 6                | -4.882047               | -2.580762 | -0.773071 |
| 37               | 1                | -2.914535               | -2.751081 | -1.652722 |

|    |   |           |           |           |
|----|---|-----------|-----------|-----------|
| 38 | 6 | -5.026016 | -1.198280 | 1.196475  |
| 39 | 1 | -3.192536 | -0.255572 | 1.826010  |
| 40 | 6 | -5.643606 | -2.030633 | 0.260963  |
| 41 | 1 | -5.347569 | -3.240808 | -1.499872 |
| 42 | 1 | -5.604145 | -0.776609 | 2.014220  |
| 43 | 1 | -6.702053 | -2.258326 | 0.343953  |

Energy = -1091.8298281

E+ZPVE = -1091.496373

Imaginary frequency: -382.8 cm<sup>-1</sup>

## 20: Toluylketenimine 23

| Center<br>Number | Atomic<br>Number | Coordinates (Angstroms) |           |           |
|------------------|------------------|-------------------------|-----------|-----------|
|                  |                  | X                       | Y         | Z         |
| 1                | 8                | -1.310152               | 1.267510  | 1.589070  |
| 2                | 7                | 2.082374                | -0.716122 | -0.973014 |
| 3                | 6                | -0.158857               | -0.096280 | 0.055499  |
| 4                | 6                | 1.049007                | -0.400824 | -0.432479 |
| 5                | 6                | -1.083130               | -1.283416 | 0.198502  |
| 6                | 8                | -0.612692               | -2.395713 | 0.417402  |
| 7                | 6                | 3.234119                | -1.380831 | -0.493231 |
| 8                | 6                | 4.462421                | -1.106695 | -1.100105 |
| 9                | 6                | 3.133040                | -2.328892 | 0.534819  |
| 10               | 6                | 5.607440                | -1.761998 | -0.650079 |
| 11               | 1                | 4.506646                | -0.381746 | -1.905760 |
| 12               | 6                | 4.283222                | -2.986586 | 0.962880  |
| 13               | 1                | 2.156957                | -2.553111 | 0.954414  |
| 14               | 6                | 5.520845                | -2.701298 | 0.379252  |
| 15               | 1                | 6.566223                | -1.544405 | -1.110534 |
| 16               | 1                | 4.211851                | -3.726498 | 1.754279  |
| 17               | 1                | 6.413348                | -3.217054 | 0.720025  |
| 18               | 6                | -2.550661               | -1.096513 | 0.019651  |
| 19               | 6                | -3.404995               | -2.105731 | 0.488684  |
| 20               | 6                | -3.105615               | -0.004584 | -0.660741 |
| 21               | 6                | -4.778277               | -2.011358 | 0.299431  |
| 22               | 1                | -2.967964               | -2.958601 | 0.996541  |
| 23               | 6                | -4.480285               | 0.075871  | -0.860903 |
| 24               | 1                | -2.462502               | 0.775183  | -1.054325 |
| 25               | 6                | -5.341356               | -0.918152 | -0.376195 |
| 26               | 1                | -5.427496               | -2.797793 | 0.675881  |
| 27               | 1                | -4.893393               | 0.923798  | -1.400918 |
| 28               | 6                | -6.835364               | -0.803657 | -0.554695 |

|    |   |           |           |           |
|----|---|-----------|-----------|-----------|
| 29 | 1 | -7.089792 | -0.244146 | -1.459591 |
| 30 | 1 | -7.308275 | -1.788162 | -0.617113 |
| 31 | 1 | -7.291655 | -0.276720 | 0.292723  |
| 32 | 6 | -0.445855 | 1.204362  | 0.722459  |
| 33 | 6 | 0.345037  | 2.424061  | 0.351004  |
| 34 | 6 | 0.449638  | 3.444695  | 1.309037  |
| 35 | 6 | 0.928207  | 2.606783  | -0.911134 |
| 36 | 6 | 1.150295  | 4.611585  | 1.021409  |
| 37 | 1 | -0.027734 | 3.297630  | 2.271853  |
| 38 | 6 | 1.619578  | 3.783125  | -1.201986 |
| 39 | 1 | 0.822685  | 1.845881  | -1.676963 |
| 40 | 6 | 1.738181  | 4.782520  | -0.235522 |
| 41 | 1 | 1.236876  | 5.390722  | 1.772945  |
| 42 | 1 | 2.059096  | 3.920994  | -2.185372 |
| 43 | 1 | 2.281456  | 5.695384  | -0.462105 |

Energy = -1091.8819657  
E+ZPVE = -1091.546234

### 21: TS10 connecting 22 and 23

| Center<br>Number | Atomic<br>Number | Coordinates (Angstroms) |           |           |
|------------------|------------------|-------------------------|-----------|-----------|
|                  |                  | X                       | Y         | Z         |
| 1                | 6                | -0.569376               | -2.618027 | -0.089047 |
| 2                | 8                | -0.739322               | -3.798176 | -0.216912 |
| 3                | 7                | -0.391908               | 0.701850  | 0.358278  |
| 4                | 6                | 0.462779                | -1.648572 | 0.029368  |
| 5                | 6                | -0.378186               | -0.518464 | 0.132291  |
| 6                | 6                | -1.870045               | -1.529872 | -0.057037 |
| 7                | 6                | -2.681085               | -1.546062 | 1.120589  |
| 8                | 6                | -2.535790               | -1.316385 | -1.302234 |
| 9                | 6                | -4.051756               | -1.370137 | 1.051858  |
| 10               | 1                | -2.199480               | -1.713097 | 2.080432  |
| 11               | 6                | -3.912401               | -1.148529 | -1.366111 |
| 12               | 1                | -1.944186               | -1.319188 | -2.214194 |
| 13               | 6                | -4.671540               | -1.178017 | -0.192239 |
| 14               | 1                | -4.651059               | -1.391479 | 1.956929  |
| 15               | 1                | -4.400178               | -0.998402 | -2.324392 |
| 16               | 1                | -5.748826               | -1.050855 | -0.242995 |
| 17               | 6                | 1.910080                | -1.891663 | 0.158565  |
| 18               | 8                | 2.291509                | -3.039118 | 0.384225  |
| 19               | 6                | 2.909549                | -0.781360 | 0.029833  |
| 20               | 6                | 4.185522                | -0.997502 | 0.574255  |

|    |   |           |           |           |
|----|---|-----------|-----------|-----------|
| 21 | 6 | 2.667346  | 0.417621  | -0.651853 |
| 22 | 6 | 5.177730  | -0.032006 | 0.462035  |
| 23 | 1 | 4.375005  | -1.940810 | 1.075176  |
| 24 | 6 | 3.671907  | 1.376451  | -0.774164 |
| 25 | 1 | 1.701130  | 0.604753  | -1.104445 |
| 26 | 6 | 4.938447  | 1.175494  | -0.212815 |
| 27 | 1 | 6.157332  | -0.215293 | 0.896914  |
| 28 | 1 | 3.468879  | 2.295811  | -1.317616 |
| 29 | 6 | -1.315076 | 1.726083  | 0.255534  |
| 30 | 6 | -1.632408 | 2.483294  | 1.397950  |
| 31 | 6 | -1.903122 | 2.056422  | -0.980013 |
| 32 | 6 | -2.549328 | 3.525405  | 1.308424  |
| 33 | 1 | -1.155212 | 2.233707  | 2.339649  |
| 34 | 6 | -2.819102 | 3.103201  | -1.055444 |
| 35 | 1 | -1.624653 | 1.497151  | -1.866455 |
| 36 | 6 | -3.148936 | 3.838322  | 0.084727  |
| 37 | 1 | -2.795908 | 4.099061  | 2.196918  |
| 38 | 1 | -3.270783 | 3.350443  | -2.011741 |
| 39 | 1 | -3.858804 | 4.657046  | 0.019156  |
| 40 | 6 | 6.012443  | 2.231428  | -0.313084 |
| 41 | 1 | 6.065355  | 2.828874  | 0.605743  |
| 42 | 1 | 7.000167  | 1.784418  | -0.463364 |
| 43 | 1 | 5.821169  | 2.920515  | -1.140490 |

Energy = -1091.8198465

E+ZPVE = -1091.486692

Imaginary frequency: - 446.4 cm<sup>-1</sup>

## 22: Toluylketenimine 23a

| Center<br>Number | Atomic<br>Number | Coordinates (Angstroms) |           |           |
|------------------|------------------|-------------------------|-----------|-----------|
|                  |                  | X                       | Y         | Z         |
| 1                | 6                | -0.379540               | 0.052206  | -0.401872 |
| 2                | 6                | -0.509908               | -1.197127 | 0.037422  |
| 3                | 6                | 0.621398                | -2.187393 | -0.070437 |
| 4                | 8                | -1.755779               | -2.436425 | 1.614170  |
| 5                | 6                | -1.797622               | -1.659872 | 0.674707  |
| 6                | 8                | 0.367072                | -3.371607 | -0.218674 |
| 7                | 7                | -0.290969               | 1.152518  | -0.913539 |
| 8                | 6                | -3.105534               | -1.127782 | 0.173630  |
| 9                | 6                | -3.285785               | -0.646340 | -1.130867 |
| 10               | 6                | -4.202817               | -1.168917 | 1.048667  |
| 11               | 6                | -4.539611               | -0.197914 | -1.546160 |

|    |   |           |           |           |
|----|---|-----------|-----------|-----------|
| 12 | 1 | -2.456620 | -0.644982 | -1.829717 |
| 13 | 6 | -5.449418 | -0.710110 | 0.636214  |
| 14 | 1 | -4.051083 | -1.566961 | 2.046266  |
| 15 | 6 | -5.619635 | -0.221976 | -0.662944 |
| 16 | 1 | -4.673538 | 0.164054  | -2.561111 |
| 17 | 1 | -6.290755 | -0.735444 | 1.322459  |
| 18 | 1 | -6.593983 | 0.132384  | -0.986956 |
| 19 | 6 | 0.019044  | 2.412662  | -0.360213 |
| 20 | 6 | 0.343018  | 3.445434  | -1.246408 |
| 21 | 6 | -0.009582 | 2.650314  | 1.022322  |
| 22 | 6 | 0.657232  | 4.708936  | -0.749683 |
| 23 | 1 | 0.348817  | 3.238843  | -2.311189 |
| 24 | 6 | 0.298722  | 3.918161  | 1.507886  |
| 25 | 1 | -0.287005 | 1.848591  | 1.700185  |
| 26 | 6 | 0.635724  | 4.948476  | 0.625603  |
| 27 | 1 | 0.914106  | 5.508100  | -1.438074 |
| 28 | 1 | 0.273039  | 4.103434  | 2.577434  |
| 29 | 1 | 0.874624  | 5.935329  | 1.009790  |
| 30 | 6 | 2.037773  | -1.703828 | -0.049168 |
| 31 | 6 | 3.013968  | -2.519314 | -0.644824 |
| 32 | 6 | 2.443899  | -0.518486 | 0.575990  |
| 33 | 6 | 4.349584  | -2.140547 | -0.640441 |
| 34 | 1 | 2.696899  | -3.449197 | -1.104714 |
| 35 | 6 | 3.788404  | -0.149533 | 0.587015  |
| 36 | 1 | 1.719628  | 0.105877  | 1.088320  |
| 37 | 6 | 4.761738  | -0.945924 | -0.027006 |
| 38 | 1 | 5.090379  | -2.779736 | -1.114410 |
| 39 | 1 | 4.086352  | 0.767570  | 1.088217  |
| 40 | 6 | 6.213369  | -0.533483 | -0.042120 |
| 41 | 1 | 6.870624  | -1.378632 | 0.186490  |
| 42 | 1 | 6.505372  | -0.157286 | -1.030333 |
| 43 | 1 | 6.413051  | 0.258831  | 0.684267  |

Energy = -1091.879022  
E+ZPVE = -1091.543325

### 23: TS11 connecting 23 and 23a

| Center<br>Number | Atomic<br>Number | Coordinates (Angstroms) |           |           |
|------------------|------------------|-------------------------|-----------|-----------|
|                  |                  | X                       | Y         | Z         |
| 1                | 8                | 0.053505                | -2.704261 | 1.647075  |
| 2                | 7                | -0.922566               | 1.289421  | -0.741875 |
| 3                | 6                | 0.138827                | -0.620256 | 0.558479  |

|    |   |           |           |           |
|----|---|-----------|-----------|-----------|
| 4  | 6 | -0.462322 | 0.368409  | -0.088134 |
| 5  | 6 | 1.431252  | -0.281050 | 1.314391  |
| 6  | 8 | 1.391020  | -0.148375 | 2.522549  |
| 7  | 6 | -1.746704 | 2.362918  | -0.330624 |
| 8  | 6 | -2.243830 | 3.209547  | -1.326249 |
| 9  | 6 | -2.055524 | 2.596680  | 1.017744  |
| 10 | 6 | -3.057163 | 4.286037  | -0.975904 |
| 11 | 1 | -1.985356 | 3.009399  | -2.360603 |
| 12 | 6 | -2.865186 | 3.676263  | 1.357296  |
| 13 | 1 | -1.655748 | 1.937594  | 1.782835  |
| 14 | 6 | -3.369120 | 4.521660  | 0.363922  |
| 15 | 1 | -3.444723 | 4.941575  | -1.749669 |
| 16 | 1 | -3.103721 | 3.859649  | 2.400563  |
| 17 | 1 | -4.000367 | 5.362041  | 0.635961  |
| 18 | 6 | 2.690652  | -0.123239 | 0.536943  |
| 19 | 6 | 3.852088  | 0.268823  | 1.224916  |
| 20 | 6 | 2.769423  | -0.362448 | -0.841257 |
| 21 | 6 | 5.052288  | 0.424045  | 0.546668  |
| 22 | 1 | 3.783901  | 0.441932  | 2.293591  |
| 23 | 6 | 3.979172  | -0.206755 | -1.514992 |
| 24 | 1 | 1.886909  | -0.682122 | -1.384562 |
| 25 | 6 | 5.137586  | 0.191836  | -0.837010 |
| 26 | 1 | 5.942671  | 0.726791  | 1.091996  |
| 27 | 1 | 4.026010  | -0.401805 | -2.583029 |
| 28 | 6 | 6.442214  | 0.386118  | -1.569433 |
| 29 | 1 | 6.431441  | -0.104192 | -2.546477 |
| 30 | 1 | 6.643233  | 1.451567  | -1.736608 |
| 31 | 1 | 7.284645  | -0.013470 | -0.996055 |
| 32 | 6 | -0.458730 | -1.961711 | 0.820664  |
| 33 | 6 | -1.688009 | -2.397534 | 0.075216  |
| 34 | 6 | -2.532120 | -3.315469 | 0.719796  |
| 35 | 6 | -1.995951 | -1.985143 | -1.228753 |
| 36 | 6 | -3.679912 | -3.783029 | 0.087412  |
| 37 | 1 | -2.265880 | -3.648008 | 1.717242  |
| 38 | 6 | -3.139738 | -2.466809 | -1.866507 |
| 39 | 1 | -1.336275 | -1.310152 | -1.762153 |
| 40 | 6 | -3.987123 | -3.358324 | -1.208236 |
| 41 | 1 | -4.333535 | -4.482243 | 0.600552  |
| 42 | 1 | -3.363952 | -2.149698 | -2.880643 |
| 43 | 1 | -4.879919 | -3.727145 | -1.704905 |

-----

Energy = -1091.8767341

E+ZPVE = -1091.541202

Imaginary frequency: - 15.3 cm<sup>-1</sup>



**24: Benzoyl(tolylimidoyl)ketene 24a**

| Center<br>Number | Atomic<br>Number | Coordinates (Angstroms) |           |           |
|------------------|------------------|-------------------------|-----------|-----------|
|                  |                  | X                       | Y         | Z         |
| 1                | 6                | 1.399790                | 1.550997  | -0.412149 |
| 2                | 8                | 1.668392                | 2.628684  | -0.764970 |
| 3                | 7                | -0.490647               | -1.403734 | -0.210151 |
| 4                | 6                | 1.101015                | 0.322657  | 0.013719  |
| 5                | 6                | -0.316561               | -0.144792 | -0.054858 |
| 6                | 6                | -1.374759               | 0.915168  | 0.002207  |
| 7                | 6                | -1.322925               | 1.932885  | 0.966264  |
| 8                | 6                | -2.426783               | 0.928813  | -0.927552 |
| 9                | 6                | -2.301404               | 2.924729  | 1.006476  |
| 10               | 1                | -0.525720               | 1.934142  | 1.703791  |
| 11               | 6                | -3.389172               | 1.931795  | -0.891283 |
| 12               | 1                | -2.486037               | 0.149290  | -1.679394 |
| 13               | 6                | -3.346845               | 2.947241  | 0.075956  |
| 14               | 1                | -2.250795               | 3.693469  | 1.773134  |
| 15               | 1                | -4.190489               | 1.927354  | -1.625741 |
| 16               | 6                | 2.180993                | -0.513428 | 0.653255  |
| 17               | 8                | 1.895885                | -1.310371 | 1.528758  |
| 18               | 6                | -1.734511               | -2.050199 | -0.138556 |
| 19               | 6                | -2.075938               | -2.948816 | -1.163576 |
| 20               | 6                | -2.589763               | -1.925447 | 0.970198  |
| 21               | 6                | -3.269477               | -3.664052 | -1.104516 |
| 22               | 1                | -1.393294               | -3.069675 | -1.998851 |
| 23               | 6                | -3.769619               | -2.664093 | 1.031626  |
| 24               | 1                | -2.311199               | -1.263491 | 1.783305  |
| 25               | 6                | -4.123026               | -3.527703 | -0.007031 |
| 26               | 1                | -3.526061               | -4.343740 | -1.912343 |
| 27               | 1                | -4.416522               | -2.562975 | 1.898691  |
| 28               | 1                | -5.045192               | -4.098510 | 0.044608  |
| 29               | 6                | 3.602683                | -0.307045 | 0.228012  |
| 30               | 6                | 4.611345                | -0.606071 | 1.157626  |
| 31               | 6                | 3.959035                | 0.121280  | -1.058744 |
| 32               | 6                | 5.950127                | -0.445208 | 0.816936  |
| 33               | 1                | 4.319343                | -0.960307 | 2.140389  |
| 34               | 6                | 5.303091                | 0.270517  | -1.401868 |
| 35               | 1                | 3.192361                | 0.302421  | -1.805025 |
| 36               | 6                | 6.298314                | -0.004208 | -0.463689 |
| 37               | 1                | 6.724687                | -0.665200 | 1.545504  |
| 38               | 1                | 5.571331                | 0.592022  | -2.403600 |
| 39               | 1                | 7.344066                | 0.116998  | -0.730739 |
| 40               | 6                | -4.385050               | 4.042642  | 0.093314  |

|    |   |           |          |           |
|----|---|-----------|----------|-----------|
| 41 | 1 | -4.436560 | 4.530008 | 1.070773  |
| 42 | 1 | -4.153178 | 4.817454 | -0.647974 |
| 43 | 1 | -5.379785 | 3.654405 | -0.146394 |

Energy = -1091.8769239

E+ZPVE = -1091.541477

### 25: TS12 connecting 23a and 24a

| Center<br>Number | Atomic<br>Number | Coordinates (Angstroms) |           |           |
|------------------|------------------|-------------------------|-----------|-----------|
|                  |                  | X                       | Y         | Z         |
| 1                | 6                | 0.181697                | -2.471236 | -0.047772 |
| 2                | 8                | 0.112646                | -3.666283 | -0.143973 |
| 3                | 7                | 0.116376                | 0.863102  | 0.335852  |
| 4                | 6                | 1.139567                | -1.421452 | 0.027875  |
| 5                | 6                | 0.214942                | -0.357379 | 0.127565  |
| 6                | 6                | -1.186189               | -1.496044 | -0.012774 |
| 7                | 6                | -1.979099               | -1.544812 | 1.178402  |
| 8                | 6                | -1.896653               | -1.363952 | -1.245150 |
| 9                | 6                | -3.355878               | -1.467627 | 1.131926  |
| 10               | 1                | -1.473538               | -1.657506 | 2.133888  |
| 11               | 6                | -3.280421               | -1.297966 | -1.281717 |
| 12               | 1                | -1.329200               | -1.348901 | -2.172306 |
| 13               | 6                | -4.035330               | -1.347873 | -0.098859 |
| 14               | 1                | -3.931996               | -1.512804 | 2.052373  |
| 15               | 1                | -3.792834               | -1.210241 | -2.235869 |
| 16               | 6                | 2.602239                | -1.543106 | 0.131150  |
| 17               | 8                | 3.086101                | -2.649074 | 0.366031  |
| 18               | 6                | 3.505425                | -0.353749 | -0.035161 |
| 19               | 6                | 4.792778                | -0.446416 | 0.516572  |
| 20               | 6                | 3.154104                | 0.795808  | -0.755201 |
| 21               | 6                | 5.700452                | 0.598354  | 0.374015  |
| 22               | 1                | 5.057114                | -1.354277 | 1.048021  |
| 23               | 6                | 4.070004                | 1.836469  | -0.911227 |
| 24               | 1                | 2.172692                | 0.878335  | -1.206116 |
| 25               | 6                | 5.340343                | 1.743877  | -0.341478 |
| 26               | 1                | 6.690234                | 0.520498  | 0.814593  |
| 27               | 1                | 3.790896                | 2.719312  | -1.479041 |
| 28               | 1                | 6.049296                | 2.558799  | -0.457802 |
| 29               | 6                | -5.536482               | -1.252025 | -0.132857 |
| 30               | 1                | -5.932712               | -1.471664 | -1.127333 |
| 31               | 1                | -5.996047               | -1.940091 | 0.583476  |
| 32               | 1                | -5.863276               | -0.240066 | 0.138558  |

|    |   |           |          |           |
|----|---|-----------|----------|-----------|
| 33 | 6 | -0.883500 | 1.812992 | 0.236168  |
| 34 | 6 | -1.215600 | 2.581924 | 1.366545  |
| 35 | 6 | -1.535201 | 2.063069 | -0.986194 |
| 36 | 6 | -2.205468 | 3.555403 | 1.279696  |
| 37 | 1 | -0.690155 | 2.396125 | 2.297257  |
| 38 | 6 | -2.524161 | 3.041643 | -1.059485 |
| 39 | 1 | -1.247524 | 1.497485 | -1.865622 |
| 40 | 6 | -2.866151 | 3.788260 | 0.069634  |
| 41 | 1 | -2.460923 | 4.138706 | 2.159412  |
| 42 | 1 | -3.022855 | 3.227706 | -2.006326 |
| 43 | 1 | -3.632289 | 4.554760 | 0.005362  |

Energy = -1091.8218895

E+ZPVE = -1091.488665

Imaginary frequency: -423.6 cm<sup>-1</sup>

## 26: Benzoyl(tolylimidoyl)ketene 24

| Center<br>Number | Atomic<br>Number | Coordinates (Angstroms) |           |           |
|------------------|------------------|-------------------------|-----------|-----------|
|                  |                  | X                       | Y         | Z         |
| 1                | 6                | 1.358528                | -2.067309 | 0.305007  |
| 2                | 8                | 1.674085                | -3.135224 | 0.631161  |
| 3                | 7                | -1.185982               | -1.646376 | -0.228320 |
| 4                | 6                | 1.011893                | -0.823486 | -0.060016 |
| 5                | 6                | -0.458232               | -0.586812 | -0.123916 |
| 6                | 6                | -0.935779               | 0.823901  | -0.022820 |
| 7                | 6                | -0.425760               | 1.685537  | 0.957092  |
| 8                | 6                | -1.913885               | 1.310646  | -0.901097 |
| 9                | 6                | -0.895907               | 2.991437  | 1.067238  |
| 10               | 1                | 0.334892                | 1.327712  | 1.645086  |
| 11               | 6                | -2.365632               | 2.621897  | -0.796409 |
| 12               | 1                | -2.316452               | 0.659935  | -1.669701 |
| 13               | 6                | -1.868286               | 3.486154  | 0.188927  |
| 14               | 1                | -0.496392               | 3.639117  | 1.843410  |
| 15               | 1                | -3.118859               | 2.982112  | -1.492349 |
| 16               | 6                | 2.032992                | 0.106343  | -0.625142 |
| 17               | 8                | 1.692483                | 0.986339  | -1.402806 |
| 18               | 6                | -2.586161               | -1.669433 | -0.091492 |
| 19               | 6                | -3.333181               | -2.352709 | -1.065422 |
| 20               | 6                | -3.249179               | -1.153094 | 1.035448  |
| 21               | 6                | -4.714773               | -2.474641 | -0.937689 |
| 22               | 1                | -2.811338               | -2.777919 | -1.916967 |
| 23               | 6                | -4.628585               | -1.300083 | 1.166536  |

|    |   |           |           |           |
|----|---|-----------|-----------|-----------|
| 24 | 1 | -2.676024 | -0.648347 | 1.806079  |
| 25 | 6 | -5.370473 | -1.951521 | 0.179271  |
| 26 | 1 | -5.279653 | -2.993404 | -1.707104 |
| 27 | 1 | -5.126033 | -0.901079 | 2.046168  |
| 28 | 1 | -6.445660 | -2.060200 | 0.284434  |
| 29 | 6 | 3.473371  | -0.071990 | -0.250599 |
| 30 | 6 | 4.442796  | 0.350513  | -1.173615 |
| 31 | 6 | 3.883394  | -0.592790 | 0.985245  |
| 32 | 6 | 5.796199  | 0.221182  | -0.879598 |
| 33 | 1 | 4.109459  | 0.774043  | -2.114917 |
| 34 | 6 | 5.241341  | -0.711010 | 1.282638  |
| 35 | 1 | 3.147648  | -0.873898 | 1.731977  |
| 36 | 6 | 6.198056  | -0.312168 | 0.348974  |
| 37 | 1 | 6.540351  | 0.537247  | -1.604494 |
| 38 | 1 | 5.550022  | -1.106184 | 2.245623  |
| 39 | 1 | 7.254868  | -0.409244 | 0.579643  |
| 40 | 6 | -2.343480 | 4.916081  | 0.278613  |
| 41 | 1 | -2.245311 | 5.308391  | 1.294948  |
| 42 | 1 | -1.756598 | 5.567752  | -0.380723 |
| 43 | 1 | -3.391125 | 5.009818  | -0.022747 |

Energy = -1091.8804837

E+ZPVE = -1091.544972

### 27: TS13 connecting 24a and 24

| Center<br>Number | Atomic<br>Number | Coordinates (Angstroms) |           |           |
|------------------|------------------|-------------------------|-----------|-----------|
|                  |                  | X                       | Y         | Z         |
| 1                | 6                | -1.489448               | -1.295873 | 1.182546  |
| 2                | 8                | -1.736132               | -1.975074 | 2.094218  |
| 3                | 7                | 0.913833                | -1.608841 | -0.122986 |
| 4                | 6                | -1.138623               | -0.484894 | 0.180683  |
| 5                | 6                | 0.361637                | -0.454137 | -0.034661 |
| 6                | 6                | 1.083151                | 0.856784  | 0.102944  |
| 7                | 6                | 0.987110                | 1.906522  | -0.818333 |
| 8                | 6                | 1.908278                | 1.022917  | 1.228584  |
| 9                | 6                | 1.706886                | 3.084699  | -0.615387 |
| 10               | 1                | 0.339651                | 1.803868  | -1.678646 |
| 11               | 6                | 2.608618                | 2.207604  | 1.427548  |
| 12               | 1                | 1.999726                | 0.217182  | 1.950718  |
| 13               | 6                | 2.525017                | 3.260571  | 0.505377  |
| 14               | 1                | 1.623436                | 3.885976  | -1.345244 |
| 15               | 1                | 3.233236                | 2.315465  | 2.310847  |

|    |   |           |           |           |
|----|---|-----------|-----------|-----------|
| 16 | 6 | -2.131094 | 0.263121  | -0.615561 |
| 17 | 8 | -1.779526 | 1.075669  | -1.464707 |
| 18 | 6 | 2.297362  | -1.816477 | -0.296283 |
| 19 | 6 | 2.910654  | -2.789060 | 0.509783  |
| 20 | 6 | 3.048449  | -1.190689 | -1.304872 |
| 21 | 6 | 4.260492  | -3.089880 | 0.346092  |
| 22 | 1 | 2.312702  | -3.294102 | 1.261924  |
| 23 | 6 | 4.391142  | -1.519585 | -1.480532 |
| 24 | 1 | 2.573045  | -0.463018 | -1.952961 |
| 25 | 6 | 5.007130  | -2.459097 | -0.651703 |
| 26 | 1 | 4.726006  | -3.831997 | 0.988343  |
| 27 | 1 | 4.959294  | -1.034903 | -2.269399 |
| 28 | 1 | 6.055180  | -2.706770 | -0.790157 |
| 29 | 6 | -3.594356 | 0.032367  | -0.365816 |
| 30 | 6 | -4.450508 | 1.139594  | -0.465352 |
| 31 | 6 | -4.137511 | -1.233400 | -0.105017 |
| 32 | 6 | -5.818760 | 0.990707  | -0.260570 |
| 33 | 1 | -4.022799 | 2.107930  | -0.701993 |
| 34 | 6 | -5.512230 | -1.382302 | 0.084846  |
| 35 | 1 | -3.502966 | -2.113887 | -0.092484 |
| 36 | 6 | -6.352275 | -0.271079 | 0.017679  |
| 37 | 1 | -6.471975 | 1.855952  | -0.322829 |
| 38 | 1 | -5.925371 | -2.368422 | 0.273696  |
| 39 | 1 | -7.421083 | -0.388041 | 0.170614  |
| 40 | 6 | 3.309738  | 4.533595  | 0.713552  |
| 41 | 1 | 3.220830  | 4.894195  | 1.743727  |
| 42 | 1 | 4.377814  | 4.376906  | 0.519132  |
| 43 | 1 | 2.966543  | 5.328750  | 0.046238  |

Energy = -1091.8738064

E+ZPVE = -1091.538241

Imaginary frequency: -21.7 cm<sup>-1</sup>

## 28: Toluoyl(phenylimidoyl)ketene 25

| Center<br>Number | Atomic<br>Number | Coordinates (Angstroms) |           |           |
|------------------|------------------|-------------------------|-----------|-----------|
|                  |                  | X                       | Y         | Z         |
| 1                | 6                | 0.032151                | -0.740234 | 1.420426  |
| 2                | 8                | 0.204827                | -1.410631 | 2.357983  |
| 3                | 7                | -2.624006               | -0.201012 | -0.007914 |
| 4                | 6                | -0.184503               | 0.032687  | 0.361898  |
| 5                | 6                | -1.593620               | 0.546742  | 0.122601  |
| 6                | 6                | -1.765685               | 2.024074  | 0.066633  |

|    |   |           |           |           |
|----|---|-----------|-----------|-----------|
| 7  | 6 | -0.761597 | 2.904061  | 0.495156  |
| 8  | 6 | -2.974721 | 2.557685  | -0.413043 |
| 9  | 6 | -0.959256 | 4.283643  | 0.449159  |
| 10 | 1 | 0.174942  | 2.510097  | 0.874721  |
| 11 | 6 | -3.169536 | 3.933463  | -0.458594 |
| 12 | 1 | -3.746268 | 1.872613  | -0.745132 |
| 13 | 6 | -2.162364 | 4.802584  | -0.028004 |
| 14 | 1 | -0.172271 | 4.951352  | 0.786818  |
| 15 | 1 | -4.107019 | 4.331946  | -0.835282 |
| 16 | 1 | -2.315471 | 5.877145  | -0.067272 |
| 17 | 6 | 0.841655  | 0.217710  | -0.703910 |
| 18 | 8 | 0.468400  | 0.490407  | -1.838750 |
| 19 | 6 | -2.576290 | -1.603431 | -0.085737 |
| 20 | 6 | -3.375183 | -2.356503 | 0.788797  |
| 21 | 6 | -1.840097 | -2.261622 | -1.086882 |
| 22 | 6 | -3.403100 | -3.746048 | 0.690674  |
| 23 | 1 | -3.962745 | -1.837955 | 1.539855  |
| 24 | 6 | -1.893526 | -3.650345 | -1.189072 |
| 25 | 1 | -1.253597 | -1.672466 | -1.784748 |
| 26 | 6 | -2.665433 | -4.399791 | -0.298636 |
| 27 | 1 | -4.013746 | -4.318979 | 1.382622  |
| 28 | 1 | -1.327826 | -4.148941 | -1.971200 |
| 29 | 1 | -2.700264 | -5.481808 | -0.381633 |
| 30 | 6 | 2.291512  | 0.045331  | -0.387241 |
| 31 | 6 | 3.156633  | -0.278256 | -1.445442 |
| 32 | 6 | 2.832543  | 0.231620  | 0.891700  |
| 33 | 6 | 4.516377  | -0.441708 | -1.219123 |
| 34 | 1 | 2.736087  | -0.395992 | -2.438261 |
| 35 | 6 | 4.200801  | 0.074457  | 1.109214  |
| 36 | 1 | 2.200047  | 0.535906  | 1.719406  |
| 37 | 6 | 5.063938  | -0.272635 | 0.063652  |
| 38 | 1 | 5.170249  | -0.701424 | -2.047790 |
| 39 | 1 | 4.604413  | 0.233952  | 2.105324  |
| 40 | 6 | 6.540620  | -0.470160 | 0.302299  |
| 41 | 1 | 6.799769  | -1.535895 | 0.296537  |
| 42 | 1 | 7.138359  | 0.009994  | -0.479090 |
| 43 | 1 | 6.849654  | -0.060615 | 1.267515  |

Energy = -1091.8831845

E+ZPVE = -1091.547423

## 29: TS14 connecting 21 and 25

| Center | Atomic | Coordinates (Angstroms) |  |  |
|--------|--------|-------------------------|--|--|
|--------|--------|-------------------------|--|--|

| Number | Number | X         | Y         | Z         |
|--------|--------|-----------|-----------|-----------|
| 1      | 6      | -0.488361 | -1.123888 | -1.297573 |
| 2      | 8      | -0.570603 | -1.931356 | -2.135534 |
| 3      | 7      | 2.073966  | -0.376918 | -0.066694 |
| 4      | 6      | -0.327872 | -0.190350 | -0.368259 |
| 5      | 6      | 1.088879  | 0.376021  | -0.188459 |
| 6      | 6      | 1.204970  | 1.869728  | -0.188451 |
| 7      | 6      | 0.207289  | 2.692972  | -0.727129 |
| 8      | 6      | 2.373262  | 2.457811  | 0.320854  |
| 9      | 6      | 0.373760  | 4.076799  | -0.757051 |
| 10     | 1      | -0.695066 | 2.250305  | -1.134908 |
| 11     | 6      | 2.534515  | 3.839280  | 0.297925  |
| 12     | 1      | 3.146609  | 1.819540  | 0.735265  |
| 13     | 6      | 1.535143  | 4.653476  | -0.242576 |
| 14     | 1      | -0.404359 | 4.703598  | -1.182225 |
| 15     | 1      | 3.439259  | 4.283320  | 0.702258  |
| 16     | 1      | 1.662339  | 5.731873  | -0.261451 |
| 17     | 6      | -1.357286 | 0.129376  | 0.658888  |
| 18     | 8      | -1.011513 | 0.681712  | 1.695456  |
| 19     | 6      | 3.155393  | -1.168203 | 0.070220  |
| 20     | 6      | 3.716053  | -1.826490 | -1.049076 |
| 21     | 6      | 3.750315  | -1.358774 | 1.339921  |
| 22     | 6      | 4.841927  | -2.628285 | -0.893411 |
| 23     | 1      | 3.263101  | -1.687229 | -2.025149 |
| 24     | 6      | 4.859047  | -2.188128 | 1.470825  |
| 25     | 1      | 3.318808  | -0.863811 | 2.203591  |
| 26     | 6      | 5.422190  | -2.824138 | 0.361815  |
| 27     | 1      | 5.262991  | -3.115532 | -1.768725 |
| 28     | 1      | 5.293479  | -2.329503 | 2.456825  |
| 29     | 1      | 6.293895  | -3.460443 | 0.473857  |
| 30     | 6      | -2.785380 | -0.248997 | 0.426234  |
| 31     | 6      | -3.597834 | -0.452503 | 1.553247  |
| 32     | 6      | -3.358706 | -0.364132 | -0.846669 |
| 33     | 6      | -4.934886 | -0.796323 | 1.405410  |
| 34     | 1      | -3.155393 | -0.335447 | 2.536640  |
| 35     | 6      | -4.705136 | -0.698619 | -0.986984 |
| 36     | 1      | -2.773297 | -0.155901 | -1.736661 |
| 37     | 6      | -5.512941 | -0.930401 | 0.132185  |
| 38     | 1      | -5.546552 | -0.961398 | 2.288772  |
| 39     | 1      | -5.136096 | -0.770864 | -1.981825 |
| 40     | 6      | -6.961713 | -1.324465 | -0.018215 |
| 41     | 1      | -7.097502 | -2.396916 | 0.167492  |
| 42     | 1      | -7.596413 | -0.791502 | 0.696815  |
| 43     | 1      | -7.332406 | -1.115122 | -1.025115 |

Energy = -1091.8555789  
E+ZPVE = -1091.521397  
Imaginary frequency: -178.0 cm<sup>-1</sup>

**30: 4aH-quinolone 26**

| Center<br>Number | Atomic<br>Number | Coordinates (Angstroms) |           |           |
|------------------|------------------|-------------------------|-----------|-----------|
|                  |                  | X                       | Y         | Z         |
| 1                | 6                | -1.508467               | -1.483822 | 0.583046  |
| 2                | 8                | -1.297404               | -2.573987 | 1.096199  |
| 3                | 7                | -2.214727               | 1.150842  | -0.405898 |
| 4                | 6                | -0.571909               | -0.357884 | 0.608228  |
| 5                | 6                | -0.954740               | 0.878630  | 0.124755  |
| 6                | 6                | -0.074303               | 2.079074  | 0.139630  |
| 7                | 6                | 0.807595                | 2.365274  | 1.195319  |
| 8                | 6                | -0.154342               | 2.982329  | -0.935483 |
| 9                | 6                | 1.606437                | 3.507706  | 1.157392  |
| 10               | 1                | 0.845413                | 1.718708  | 2.062867  |
| 11               | 6                | 0.657368                | 4.111840  | -0.977266 |
| 12               | 1                | -0.862547               | 2.785296  | -1.732367 |
| 13               | 6                | 1.543124                | 4.378264  | 0.069493  |
| 14               | 1                | 2.273060                | 3.720182  | 1.987864  |
| 15               | 1                | 0.593141                | 4.790286  | -1.823031 |
| 16               | 1                | 2.169898                | 5.264922  | 0.042117  |
| 17               | 6                | 0.737567                | -0.661997 | 1.309751  |
| 18               | 8                | 0.779017                | -0.675907 | 2.531883  |
| 19               | 6                | -3.095911               | 0.195119  | -0.503679 |
| 20               | 6                | -4.449287               | 0.502172  | -0.892545 |
| 21               | 6                | -2.755723               | -1.254014 | -0.276048 |
| 22               | 6                | -5.427165               | -0.439687 | -0.791978 |
| 23               | 1                | -4.662388               | 1.524375  | -1.186897 |
| 24               | 6                | -3.905295               | -2.168890 | -0.014156 |
| 25               | 1                | -2.358990               | -1.559923 | -1.271337 |
| 26               | 6                | -5.163330               | -1.778170 | -0.300603 |
| 27               | 1                | -6.450586               | -0.174768 | -1.043135 |
| 28               | 1                | -3.665574               | -3.151653 | 0.377187  |
| 29               | 1                | -6.000579               | -2.452085 | -0.147093 |
| 30               | 6                | 1.932524                | -0.997628 | 0.484248  |
| 31               | 6                | 3.123078                | -1.346005 | 1.144370  |
| 32               | 6                | 1.914756                | -0.989579 | -0.916021 |
| 33               | 6                | 4.259093                | -1.675177 | 0.419352  |
| 34               | 1                | 3.124643                | -1.355410 | 2.229080  |
| 35               | 6                | 3.059966                | -1.319240 | -1.638426 |



|    |   |          |           |           |
|----|---|----------|-----------|-----------|
| 36 | 1 | 1.003487 | -0.724807 | -1.441896 |
| 37 | 6 | 4.249173 | -1.665933 | -0.986280 |
| 38 | 1 | 5.171872 | -1.947294 | 0.943685  |
| 39 | 1 | 3.030608 | -1.308900 | -2.724744 |
| 40 | 6 | 5.495525 | -2.010711 | -1.763877 |
| 41 | 1 | 6.255126 | -1.226724 | -1.658211 |
| 42 | 1 | 5.944394 | -2.942075 | -1.402628 |
| 43 | 1 | 5.284801 | -2.126903 | -2.830168 |

Energy = -1091.8727474  
E+ZPVE = -1091.536030

### 31: TS15 connecting 25 and 26

| Center<br>Number | Atomic<br>Number | Coordinates (Angstroms) |           |           |
|------------------|------------------|-------------------------|-----------|-----------|
|                  |                  | X                       | Y         | Z         |
| 1                | 6                | 0.461089                | -1.550476 | -0.238377 |
| 2                | 8                | -0.207376               | -2.538275 | -0.330592 |
| 3                | 7                | 2.714566                | 0.373782  | -0.044321 |
| 4                | 6                | 0.332475                | -0.192010 | 0.046750  |
| 5                | 6                | 1.444651                | 0.732548  | -0.058210 |
| 6                | 6                | -0.862928               | 0.222034  | 0.873300  |
| 7                | 8                | -0.702827               | 0.958386  | 1.838444  |
| 8                | 6                | 3.057601                | -0.927539 | -0.092858 |
| 9                | 6                | 4.163704                | -1.407213 | 0.655064  |
| 10               | 6                | 2.264727                | -1.857463 | -0.850632 |
| 11               | 6                | 4.451877                | -2.753426 | 0.666969  |
| 12               | 1                | 4.746271                | -0.693035 | 1.226612  |
| 13               | 6                | 2.625540                | -3.248657 | -0.835940 |
| 14               | 1                | 1.871603                | -1.479746 | -1.797950 |
| 15               | 6                | 3.675347                | -3.687703 | -0.075002 |
| 16               | 1                | 5.285855                | -3.115202 | 1.261935  |
| 17               | 1                | 2.033243                | -3.945161 | -1.420585 |
| 18               | 1                | 3.932998                | -4.741343 | -0.044150 |
| 19               | 6                | -2.232644               | -0.246169 | 0.498315  |
| 20               | 6                | -2.564571               | -0.686766 | -0.789277 |
| 21               | 6                | -3.247397               | -0.161788 | 1.464547  |
| 22               | 6                | -3.876491               | -1.037127 | -1.099055 |
| 23               | 1                | -1.798613               | -0.743155 | -1.554935 |
| 24               | 6                | -4.550906               | -0.527537 | 1.154002  |
| 25               | 1                | -2.988652               | 0.201600  | 2.453365  |
| 26               | 6                | -4.889125               | -0.973851 | -0.133418 |

|    |   |           |           |           |
|----|---|-----------|-----------|-----------|
| 27 | 1 | -4.119030 | -1.366623 | -2.106037 |
| 28 | 1 | -5.323589 | -0.462102 | 1.916028  |
| 29 | 6 | 1.194439  | 2.191564  | -0.177293 |
| 30 | 6 | 0.040187  | 2.685167  | -0.805567 |
| 31 | 6 | 2.162501  | 3.102803  | 0.274953  |
| 32 | 6 | -0.144934 | 4.055746  | -0.969928 |
| 33 | 1 | -0.705374 | 1.993172  | -1.183029 |
| 34 | 6 | 1.971834  | 4.472128  | 0.117259  |
| 35 | 1 | 3.054132  | 2.716539  | 0.754902  |
| 36 | 6 | 0.817728  | 4.953575  | -0.505655 |
| 37 | 1 | -1.039670 | 4.422242  | -1.464153 |
| 38 | 1 | 2.722448  | 5.166504  | 0.483264  |
| 39 | 1 | 0.670235  | 6.022554  | -0.629446 |
| 40 | 6 | -6.301694 | -1.394310 | -0.458272 |
| 41 | 1 | -7.035163 | -0.754985 | 0.042840  |
| 42 | 1 | -6.494462 | -1.356673 | -1.534085 |
| 43 | 1 | -6.490639 | -2.423132 | -0.127193 |

Energy = -1091.859442  
E+ZPVE = -1091.524255  
Imaginary frequency: -396.0 cm<sup>-1</sup>

### 32: 3H-quinolone 27

| Center<br>Number | Atomic<br>Number | Coordinates (Angstroms) |           |           |
|------------------|------------------|-------------------------|-----------|-----------|
|                  |                  | X                       | Y         | Z         |
| 1                | 6                | -0.842290               | -1.525448 | -0.916999 |
| 2                | 8                | -0.169045               | -2.307040 | -1.574995 |
| 3                | 7                | -2.568638               | 0.544563  | 0.146346  |
| 4                | 6                | -1.370146               | 0.877062  | -0.191228 |
| 5                | 6                | -1.023513               | 2.319978  | -0.214335 |
| 6                | 6                | 0.280187                | 2.774972  | -0.474775 |
| 7                | 6                | -2.028685               | 3.273903  | 0.033595  |
| 8                | 6                | 0.569657                | 4.139230  | -0.487143 |
| 9                | 1                | 1.086799                | 2.073172  | -0.657384 |
| 10               | 6                | -1.738702               | 4.632610  | 0.016050  |
| 11               | 1                | -3.031487               | 2.918372  | 0.238837  |
| 12               | 6                | -0.437275               | 5.072632  | -0.245305 |
| 13               | 1                | 1.584649                | 4.469977  | -0.685872 |
| 14               | 1                | -2.527960               | 5.353733  | 0.207571  |
| 15               | 1                | -0.211557               | 6.134904  | -0.258454 |
| 16               | 6                | 0.672131                | -0.321640 | 0.660574  |

|    |   |           |           |           |
|----|---|-----------|-----------|-----------|
| 17 | 8 | 0.224682  | -0.243906 | 1.790364  |
| 18 | 6 | -2.961845 | -0.797051 | 0.148562  |
| 19 | 6 | -4.235597 | -1.099881 | 0.651644  |
| 20 | 6 | -2.173468 | -1.843496 | -0.381919 |
| 21 | 6 | -4.705388 | -2.409731 | 0.634062  |
| 22 | 1 | -4.835899 | -0.287511 | 1.046899  |
| 23 | 6 | -2.666073 | -3.153912 | -0.419599 |
| 24 | 6 | -3.924828 | -3.441798 | 0.095944  |
| 25 | 1 | -5.690727 | -2.631013 | 1.033998  |
| 26 | 1 | -2.037134 | -3.927148 | -0.848859 |
| 27 | 1 | -4.301742 | -4.459627 | 0.081030  |
| 28 | 6 | 2.118286  | -0.573918 | 0.400980  |
| 29 | 6 | 3.000977  | -0.449821 | 1.489309  |
| 30 | 6 | 2.634434  | -0.938142 | -0.851472 |
| 31 | 6 | 4.361234  | -0.663646 | 1.321085  |
| 32 | 1 | 2.591744  | -0.182537 | 2.457568  |
| 33 | 6 | 4.001281  | -1.163653 | -1.005877 |
| 34 | 1 | 1.968412  | -1.104825 | -1.690175 |
| 35 | 6 | 4.887731  | -1.021495 | 0.068255  |
| 36 | 1 | 5.030699  | -0.556032 | 2.170787  |
| 37 | 1 | 4.384467  | -1.461532 | -1.978055 |
| 38 | 6 | 6.370728  | -1.234448 | -0.108602 |
| 39 | 1 | 6.909084  | -0.278871 | -0.094540 |
| 40 | 1 | 6.783805  | -1.846694 | 0.699643  |
| 41 | 1 | 6.595521  | -1.727018 | -1.058113 |
| 42 | 6 | -0.295301 | -0.136253 | -0.555280 |
| 43 | 1 | 0.275492  | 0.211956  | -1.417397 |

Energy = -1091.9244674

E+ZPVE = -1091.585703

### 33: TS16 connecting 26 and 27

| Center<br>Number | Atomic<br>Number | Coordinates (Angstroms) |           |           |
|------------------|------------------|-------------------------|-----------|-----------|
|                  |                  | X                       | Y         | Z         |
| 1                | 6                | -1.897945               | -0.996919 | 1.325342  |
| 2                | 8                | -1.989714               | -1.748842 | 2.268043  |
| 3                | 7                | -2.062503               | 1.318085  | -0.419524 |
| 4                | 6                | -0.689262               | -0.263781 | 0.817674  |
| 5                | 6                | -0.915551               | 1.015542  | 0.188627  |
| 6                | 6                | 0.137680                | 2.066037  | 0.130162  |
| 7                | 6                | 0.988487                | 2.327306  | 1.216523  |
| 8                | 6                | 0.244350                | 2.862370  | -1.022865 |

|    |   |           |           |           |
|----|---|-----------|-----------|-----------|
| 9  | 6 | 1.935939  | 3.347982  | 1.139251  |
| 10 | 1 | 0.893889  | 1.753883  | 2.131136  |
| 11 | 6 | 1.198537  | 3.872285  | -1.099786 |
| 12 | 1 | -0.432145 | 2.675722  | -1.849421 |
| 13 | 6 | 2.049562  | 4.116965  | -0.018796 |
| 14 | 1 | 2.580148  | 3.545398  | 1.990759  |
| 15 | 1 | 1.278109  | 4.471628  | -2.002071 |
| 16 | 1 | 2.791942  | 4.907630  | -0.077613 |
| 17 | 6 | 0.639175  | -0.681752 | 1.400528  |
| 18 | 8 | 0.772227  | -0.711985 | 2.616863  |
| 19 | 6 | -3.003413 | 0.358667  | -0.511010 |
| 20 | 6 | -4.124655 | 0.553687  | -1.366789 |
| 21 | 6 | -2.866963 | -0.917200 | 0.165789  |
| 22 | 6 | -5.047584 | -0.446750 | -1.545312 |
| 23 | 1 | -4.208788 | 1.510839  | -1.870215 |
| 24 | 6 | -3.884677 | -1.913398 | -0.001372 |
| 25 | 1 | -1.521607 | -1.111952 | -0.265775 |
| 26 | 6 | -4.924952 | -1.692388 | -0.862885 |
| 27 | 1 | -5.892921 | -0.288134 | -2.208276 |
| 28 | 1 | -3.804865 | -2.824836 | 0.582160  |
| 29 | 1 | -5.684173 | -2.454839 | -1.008799 |
| 30 | 6 | 1.737143  | -1.113431 | 0.485524  |
| 31 | 6 | 2.949661  | -1.522505 | 1.066821  |
| 32 | 6 | 1.619517  | -1.136291 | -0.910640 |
| 33 | 6 | 4.008168  | -1.938685 | 0.272465  |
| 34 | 1 | 3.030434  | -1.506983 | 2.148368  |
| 35 | 6 | 2.687828  | -1.553070 | -1.702505 |
| 36 | 1 | 0.694438  | -0.829011 | -1.386098 |
| 37 | 6 | 3.898298  | -1.959098 | -1.128388 |
| 38 | 1 | 4.937757  | -2.255227 | 0.738991  |
| 39 | 1 | 2.579393  | -1.564859 | -2.783718 |
| 40 | 6 | 5.062739  | -2.394372 | -1.983388 |
| 41 | 1 | 5.865076  | -1.646967 | -1.963782 |
| 42 | 1 | 5.492227  | -3.334677 | -1.622024 |
| 43 | 1 | 4.765986  | -2.534795 | -3.026020 |

-----  
Energy = -1091.8295751  
E+ZPVE = -1091.497391  
Imaginary frequency: -1551.5 cm<sup>-1</sup>

### 34: 4-toloyloxyquinoline 28

-----  
Center Atomic Coordinates (Angstroms)  
Number Number X Y Z

---

|    |   |           |           |           |
|----|---|-----------|-----------|-----------|
| 1  | 6 | -0.234267 | 0.576980  | 0.013161  |
| 2  | 6 | -2.557661 | -0.053665 | 0.060886  |
| 3  | 6 | -3.609751 | -1.103957 | 0.126335  |
| 4  | 6 | -3.349637 | -2.436583 | -0.231579 |
| 5  | 6 | -4.906066 | -0.761458 | 0.545382  |
| 6  | 6 | -4.354373 | -3.400787 | -0.161436 |
| 7  | 1 | -2.368381 | -2.722295 | -0.596931 |
| 8  | 6 | -5.906438 | -1.726283 | 0.619126  |
| 9  | 1 | -5.106313 | 0.270928  | 0.808242  |
| 10 | 6 | -5.634697 | -3.051194 | 0.268677  |
| 11 | 1 | -4.136667 | -4.424814 | -0.450602 |
| 12 | 1 | -6.901418 | -1.445260 | 0.952442  |
| 13 | 1 | -6.416063 | -3.803499 | 0.325834  |
| 14 | 6 | -2.032788 | 2.193845  | -0.077926 |
| 15 | 6 | -2.479888 | 3.540104  | -0.155692 |
| 16 | 6 | -0.624649 | 1.941024  | -0.086475 |
| 17 | 6 | -1.577101 | 4.575461  | -0.241474 |
| 18 | 1 | -3.551027 | 3.711784  | -0.148160 |
| 19 | 6 | 0.284967  | 3.023650  | -0.178386 |
| 20 | 6 | -0.185091 | 4.316298  | -0.255902 |
| 21 | 1 | -1.931178 | 5.600409  | -0.301940 |
| 22 | 1 | 1.349245  | 2.817517  | -0.192406 |
| 23 | 1 | 0.514601  | 5.143362  | -0.329955 |
| 24 | 7 | -2.965149 | 1.205482  | -0.009110 |
| 25 | 8 | 1.129644  | 0.355781  | 0.109198  |
| 26 | 6 | 1.743073  | -0.742212 | -0.455721 |
| 27 | 8 | 1.159968  | -1.575866 | -1.110168 |
| 28 | 6 | 3.197623  | -0.750344 | -0.163415 |
| 29 | 6 | 3.815543  | 0.194153  | 0.668113  |
| 30 | 6 | 3.972533  | -1.764640 | -0.744390 |
| 31 | 6 | 5.184679  | 0.120566  | 0.906846  |
| 32 | 1 | 3.222042  | 0.973194  | 1.131840  |
| 33 | 6 | 5.339264  | -1.826603 | -0.501691 |
| 34 | 1 | 3.483164  | -2.494533 | -1.380096 |
| 35 | 6 | 5.970331  | -0.884346 | 0.325014  |
| 36 | 1 | 5.653180  | 0.853509  | 1.558171  |
| 37 | 1 | 5.929051  | -2.618231 | -0.956164 |
| 38 | 6 | 7.459455  | -0.939137 | 0.561535  |
| 39 | 1 | 7.824540  | -1.970239 | 0.575724  |
| 40 | 1 | 8.001095  | -0.414155 | -0.235179 |
| 41 | 1 | 7.732919  | -0.465865 | 1.508631  |
| 42 | 6 | -1.178517 | -0.414753 | 0.093785  |
| 43 | 1 | -0.878932 | -1.446232 | 0.193439  |

---

Energy = -1091.9538201  
E+ZPVE = -1091.614602

**34: TS17 connecting 27 and 28**

| Center<br>Number | Atomic<br>Number | Coordinates (Angstroms) |           |           |
|------------------|------------------|-------------------------|-----------|-----------|
|                  |                  | X                       | Y         | Z         |
| 1                | 6                | -1.023476               | -1.456067 | -0.227827 |
| 2                | 8                | -0.221495               | -2.432836 | -0.030540 |
| 3                | 7                | -2.655886               | 0.872758  | -0.036515 |
| 4                | 6                | -1.350958               | 1.001586  | -0.130025 |
| 5                | 6                | -0.799999               | 2.382052  | -0.113708 |
| 6                | 6                | 0.575323                | 2.627152  | 0.030504  |
| 7                | 6                | -1.666717               | 3.481054  | -0.243906 |
| 8                | 6                | 1.070497                | 3.930512  | 0.036748  |
| 9                | 1                | 1.265622                | 1.799543  | 0.156990  |
| 10               | 6                | -1.171381               | 4.780988  | -0.237037 |
| 11               | 1                | -2.727531               | 3.285588  | -0.349137 |
| 12               | 6                | 0.200067                | 5.012348  | -0.098974 |
| 13               | 1                | 2.137020                | 4.100214  | 0.153464  |
| 14               | 1                | -1.855474               | 5.618233  | -0.342379 |
| 15               | 1                | 0.585872                | 6.027727  | -0.094992 |
| 16               | 6                | 0.847663                | -1.111135 | 1.125963  |
| 17               | 8                | 0.463477                | -1.131428 | 2.238348  |
| 18               | 6                | -3.216480               | -0.385563 | -0.126828 |
| 19               | 6                | -4.624012               | -0.488146 | -0.086831 |
| 20               | 6                | -2.460203               | -1.588375 | -0.232457 |
| 21               | 6                | -5.243479               | -1.724828 | -0.159911 |
| 22               | 1                | -5.196047               | 0.429364  | 0.002085  |
| 23               | 6                | -3.104305               | -2.839562 | -0.278203 |
| 24               | 6                | -4.486308               | -2.908968 | -0.257527 |
| 25               | 1                | -6.327990               | -1.783587 | -0.132696 |
| 26               | 1                | -2.492075               | -3.734124 | -0.329258 |
| 27               | 1                | -4.987314               | -3.871019 | -0.301808 |
| 28               | 6                | 2.193016                | -1.128098 | 0.528617  |
| 29               | 6                | 3.218513                | -0.562462 | 1.304466  |
| 30               | 6                | 2.482249                | -1.668103 | -0.728532 |
| 31               | 6                | 4.517972                | -0.531321 | 0.808311  |
| 32               | 1                | 2.991418                | -0.161331 | 2.286371  |
| 33               | 6                | 3.789177                | -1.638027 | -1.202092 |
| 34               | 1                | 1.684799                | -2.136628 | -1.292900 |
| 35               | 6                | 4.826326                | -1.062762 | -0.451732 |
| 36               | 1                | 5.307094                | -0.094140 | 1.413902  |
| 37               | 1                | 4.011673                | -2.074579 | -2.171813 |

|    |   |           |           |           |
|----|---|-----------|-----------|-----------|
| 38 | 6 | 6.231600  | -1.000041 | -0.996543 |
| 39 | 1 | 6.445692  | -1.851458 | -1.648725 |
| 40 | 1 | 6.379498  | -0.089665 | -1.590599 |
| 41 | 1 | 6.973069  | -0.988904 | -0.192934 |
| 42 | 6 | -0.464434 | -0.135284 | -0.276301 |
| 43 | 1 | 0.416111  | 0.007859  | -0.889478 |

Energy = -1091.8650954

E+ZPVE = -1091.529209

Imaginary frequency: -524.3 cm<sup>-1</sup>

### 36: 4-quinolone 29

| Center<br>Number | Atomic<br>Number | Coordinates (Angstroms) |           |           |
|------------------|------------------|-------------------------|-----------|-----------|
|                  |                  | X                       | Y         | Z         |
| 1                | 6                | -0.871173               | -1.512205 | 0.799765  |
| 2                | 8                | -0.191020               | -2.409328 | 1.308087  |
| 3                | 6                | -0.382121               | -0.134075 | 0.673474  |
| 4                | 6                | -1.171979               | 0.855133  | 0.136393  |
| 5                | 6                | -0.794209               | 2.282469  | -0.063079 |
| 6                | 6                | -0.325517               | 3.077877  | 0.994058  |
| 7                | 6                | -0.961894               | 2.863486  | -1.332934 |
| 8                | 6                | -0.029352               | 4.423112  | 0.776856  |
| 9                | 1                | -0.189032               | 2.632747  | 1.971426  |
| 10               | 6                | -0.659292               | 4.207356  | -1.543727 |
| 11               | 1                | -1.301927               | 2.251474  | -2.164049 |
| 12               | 6                | -0.194312               | 4.991593  | -0.486892 |
| 13               | 1                | 0.329667                | 5.029150  | 1.603159  |
| 14               | 1                | -0.780054               | 4.638165  | -2.533191 |
| 15               | 1                | 0.040671                | 6.039404  | -0.648821 |
| 16               | 6                | 1.007036                | 0.123764  | 1.211992  |
| 17               | 8                | 1.164550                | 0.795795  | 2.224696  |
| 18               | 6                | -2.985168               | -0.715920 | -0.285993 |
| 19               | 6                | -4.281549               | -0.954112 | -0.778058 |
| 20               | 6                | -2.231504               | -1.764198 | 0.274108  |
| 21               | 6                | -4.810012               | -2.233436 | -0.711003 |
| 22               | 1                | -4.857097               | -0.137256 | -1.206012 |
| 23               | 6                | -2.790555               | -3.051469 | 0.328803  |
| 24               | 6                | -4.065547               | -3.290297 | -0.157860 |
| 25               | 1                | -5.810767               | -2.416742 | -1.090798 |
| 26               | 1                | -2.184421               | -3.837197 | 0.767309  |
| 27               | 1                | -4.492707               | -4.286986 | -0.111787 |
| 28               | 6                | 2.174882                | -0.456991 | 0.490527  |

|    |   |           |           |           |
|----|---|-----------|-----------|-----------|
| 29 | 6 | 3.448215  | -0.329361 | 1.067897  |
| 30 | 6 | 2.059192  | -1.090117 | -0.753543 |
| 31 | 6 | 4.569662  | -0.829030 | 0.419609  |
| 32 | 1 | 3.529849  | 0.168446  | 2.028077  |
| 33 | 6 | 3.188144  | -1.585172 | -1.401119 |
| 34 | 1 | 1.085134  | -1.189012 | -1.220524 |
| 35 | 6 | 4.459935  | -1.469052 | -0.825620 |
| 36 | 1 | 5.548813  | -0.724249 | 0.880499  |
| 37 | 1 | 3.082143  | -2.071143 | -2.367521 |
| 38 | 6 | 5.678991  | -2.036967 | -1.510206 |
| 39 | 1 | 6.550625  | -1.388143 | -1.378756 |
| 40 | 1 | 5.940921  | -3.017590 | -1.093652 |
| 41 | 1 | 5.511794  | -2.171242 | -2.582544 |
| 42 | 7 | -2.426763 | 0.548587  | -0.340530 |
| 43 | 1 | -2.995737 | 1.313994  | -0.672053 |

-----  
Energy = -1091.9402795  
E+ZPVE = -1091.600836
